# Supplementary material for: Stochastic Modeling of Expression Kinetics Identifies Messenger Half-Lives and Reveals Sequential Waves of Co-ordinated Transcription and Decay
Source: PLOS journal article supplement (doi:10.1371/journal.pcbi.1002772), 2012-11-08
Supplement: S14 (10.1371/journal.pcbi.1002772.s014) [file journal.pcbi.1002772.s014]

301 Moved Permanently

# Moved Permanently

The document has moved here.

---

Apache Server at www.ploscompbiol.org Port 80
