# Supplementary material for: Stochastic Modeling of Expression Kinetics Identifies Messenger Half-Lives and Reveals Sequential Waves of Co-ordinated Transcription and Decay
Source: PLoS Comput Biol. 2012 Nov 8;8(11):e1002772. doi: 10.1371/journal.pcbi.1002772 (PMC3493476; doi:10.1371/journal.pcbi.1002772)
Supplement: Table S2 — DRAGON estimated half-lives using alpha38 dataset. (XLSX) [file pcbi.1002772.s008.xlsx]

## Sheet: Foglio1
Orf	hl (min)	Ci (normalized to max=1)	Annotation
YEL060C	0.9	0.41	cellular response to starvation
YER150W	1	0.45	biological_process unknown
YKL109W	1.1	0.3	regulation of carbohydrate metabolism
YLR180W	1.1	0.32	methionine metabolism
YKL163W	1.2	0.63	cell wall organization and biogenesis
YEL071W	1.3	0.59	lactate metabolism
YMR008C	1.3	0.5	glycerophospholipid metabolism
YDR502C	1.4	0.26	methionine metabolism
YKL104C	1.4	0.4	cell wall chitin biosynthesis
YBR296C	1.5	0.53	phosphate transport
YCR005C	1.5	0.88	citrate metabolism
YDR055W	1.5	0.55	biological_process unknown
YAR071W	1.6	0.27	phosphate metabolism
YEL032W	1.6	0.45	DNA replication initiation
YHL021C	1.6	0.38	biological_process unknown
YCL040W	1.8	0.76	carbohydrate metabolism
YOR028C	1.8	0.45	regulation of transcription from Pol II promoter
YOR347C	1.8	0.4	glycolysis
YBL112C	1.9	0.57	biological_process unknown
YGR143W	1.9	0.28	beta-1,6 glucan biosynthesis
YMR305C	1.9	0.59	conjugation with cellular fusion
YDL124W	2	0.47	biological_process unknown
YOR374W	2	0.6	ethanol metabolism
YDL164C	2.1	0.77	DNA ligation
YEL040W	2.1	0.45	cell wall organization and biogenesis
YGL101W	2.1	0.25	biological_process unknown
YOR230W	2.1	0.37	regulation of meiosis
YPL247C	2.1	0.36	biological_process unknown
YAL053W	2.2	0.3	biological_process unknown
YCL061C	2.2	0.79	DNA replication checkpoint
YGL055W	2.2	0.63	fatty acid desaturation
YHR113W	2.2	0.46	biological_process unknown
YKL103C	2.2	0.4	vacuolar protein catabolism
YLR080W	2.2	0.29	ER to Golgi transport
YLR121C	2.2	0.84	protein metabolism
YLR297W	2.2	0.22	biological_process unknown
YOL014W	2.2	0.34	biological_process unknown
YPL014W	2.2	0.66	biological_process unknown
YPL061W	2.2	0.25	acetate biosynthesis
YPR135W	2.2	0.72	DNA dependent DNA replication
YBL023C	2.3	0.42	DNA replication initiation
YBR202W	2.3	0.35	DNA replication initiation
YDL089W	2.3	0.34	biological_process unknown
YDL105W	2.3	0.79	biological_process unknown
YGR092W	2.3	0.24	nuclear division
YJL155C	2.3	0.55	gluconeogenesis
YLR194C	2.3	0.54	biological_process unknown
YMR075W	2.3	0.44	biological_process unknown
YPL267W	2.3	0.32	biological_process unknown
YPR019W	2.3	0.4	DNA replication initiation
YDR077W	2.4	0.57	cell wall organization and biogenesis
YGL201C	2.4	0.41	DNA replication initiation
YNL181W	2.4	0.65	biological_process unknown
YPL221W	2.4	0.77	biological_process unknown
YDL127W	2.5	0.35	cell cycle
YDR309C	2.5	0.31	Rho protein signal transduction
YFL064C	2.5	0.89	biological_process unknown
YGR041W	2.5	0.32	bud site selection
YJR137C	2.5	0.32	cell wall organization and biogenesis
YNL082W	2.5	0.8	meiosis
YOR132W	2.5	0.33	retrograde (endosome to Golgi) transport
YPL153C	2.5	0.73	DNA repair
YPL232W	2.5	0.39	Golgi to plasma membrane transport
YPR018W	2.5	0.78	nucleosome assembly
YPR175W	2.5	0.77	lagging strand elongation
YBL111C	2.6	0.62	biological_process unknown
YBR067C	2.6	0.69	cell wall organization and biogenesis
YBR126C	2.6	0.3	carbohydrate metabolism
YDL101C	2.6	0.77	DNA damage response, signal transduction resulting in cell cycle arrest
YDR171W	2.6	0.68	cytoskeleton organization and biogenesis
YGL163C	2.6	0.74	chromatin modeling
YJR030C	2.6	0.71	biological_process unknown
YKL151C	2.6	0.22	biological_process unknown
YLR103C	2.6	0.75	DNA replication initiation
YLR383W	2.6	0.67	DNA repair
YML020W	2.6	0.76	biological_process unknown
YMR251W-A	2.6	0.68	response to stress
YOL019W	2.6	0.35	biological_process unknown
YPL265W	2.6	0.64	amino acid transport
YBR071W	2.7	0.71	biological_process unknown
YBR073W	2.7	0.8	double-strand break repair via break-induced replication
YDR528W	2.7	0.42	cell wall organization and biogenesis
YER042W	2.7	0.22	response to oxidative stress
YJL116C	2.7	0.26	mitochondrion organization and biogenesis
YKL045W	2.7	0.84	DNA repair synthesis
YLR032W	2.7	0.82	DNA repair
YNL273W	2.7	0.75	DNA topological change
YOR342C	2.7	0.49	biological_process unknown
YBR200W	2.8	0.22	cellular morphogenesis during conjugation with cellular fusion
YBR275C	2.8	0.69	chromatin silencing at telomere
YDR191W	2.8	0.4	chromatin silencing at telomere
YGR189C	2.8	0.68	biological_process unknown
YHR146W	2.8	0.32	biological_process unknown
YKL218C	2.8	0.26	biological_process unknown
YLL012W	2.8	0.2	biological_process unknown
YLR454W	2.8	0.25	biological_process unknown
YMR179W	2.8	0.83	regulation of transcription from Pol II promoter
YOR066W	2.8	0.48	biological_process unknown
YER018C	2.9	0.42	chromosome segregation
YER095W	2.9	0.87	chromatin modeling
YFL008W	2.9	0.68	mitotic chromosome segregation
YFL065C	2.9	0.75	biological_process unknown
YGR042W	2.9	0.5	biological_process unknown
YGR238C	2.9	0.41	conjugation with cellular fusion
YKR013W	2.9	0.57	biological_process unknown
YKR098C	2.9	0.28	biological_process unknown
YOR195W	2.9	0.75	meiosis
YOR284W	2.9	0.83	biological_process unknown
YPR157W	2.9	0.3	biological_process unknown
YPR174C	2.9	0.74	biological_process unknown
YBL113C	3	0.78	biological_process unknown
YDL156W	3	0.69	biological_process unknown
YGL207W	3	0.67	RNA elongation from Pol II promoter
YJL073W	3	0.75	karyogamy during conjugation with cellular fusion
YJL164C	3	0.48	RAS protein signal transduction
YJR043C	3	0.79	base-excision repair
YLR313C	3	0.78	Rho protein signal transduction
YML100W	3	0.29	response to stress
YNL036W	3	0.24	biological_process unknown
YNL233W	3	0.75	cytokinesis
YOL006C	3	0.51	DNA strand elongation
YOL017W	3	0.8	chromatin silencing
YOR144C	3	0.74	negative regulation of DNA recombination
YOR313C	3	0.24	DNA metabolism
YDL102W	3.1	0.81	base-excision repair
YDL197C	3.1	0.73	chromatin silencing at HML and HMR (sensu Saccharomyces)
YEL047C	3.1	0.4	metabolism
YEL076C	3.1	0.8	biological_process unknown
YEL076C-A	3.1	0.69	biological_process unknown
YGL257C	3.1	0.18	O-linked glycosylation
YGR138C	3.1	0.48	polyamine transport
YJL115W	3.1	0.81	DNA damage response, signal transduction resulting in induction of apoptosis
YKL042W	3.1	0.82	microtubule nucleation
YKL116C	3.1	0.33	MAPKKK cascade
YLL021W	3.1	1	Rho protein signal transduction
YML060W	3.1	0.8	DNA repair
YDR503C	3.2	0.81	phospholipid metabolism
YER111C	3.2	0.76	G1/S transition of mitotic cell cycle
YGL037C	3.2	0.57	cell aging (sensu Saccharomyces)
YJL019W	3.2	0.81	nuclear migration during conjugation with cellular fusion
YLL022C	3.2	0.68	biological_process unknown
YLR274W	3.2	0.4	DNA replication initiation
YML069W	3.2	0.71	DNA dependent DNA replication
YMR006C	3.2	0.31	glycerophospholipid metabolism
YMR076C	3.2	0.61	mitotic chromosome condensation
YMR078C	3.2	0.82	sister chromatid cohesion
YCL024W	3.3	0.75	axial budding
YDR516C	3.3	0.43	biological_process unknown
YGR152C	3.3	0.77	axial budding
YGR221C	3.3	0.82	biological_process unknown
YHR104W	3.3	0.48	arabinose metabolism
YML072C	3.3	0.23	biological_process unknown
YMR238W	3.3	0.4	cell wall biosynthesis (sensu Fungi)
YPL208W	3.3	0.84	biological_process unknown
YPR159W	3.3	0.6	beta-1,6 glucan biosynthesis
YDL103C	3.4	0.71	UDP-N-acetylglucosamine biosynthesis
YDL138W	3.4	0.31	response to glucose stimulus
YKL165C	3.4	0.76	GPI anchor biosynthesis
YML061C	3.4	0.88	DNA recombination
YNL072W	3.4	0.77	DNA replication
YNL102W	3.4	0.64	DNA repair synthesis
YPL255W	3.4	0.77	microtubule nucleation
YAR003W	3.5	0.74	chromatin silencing at telomere
YDL093W	3.5	0.79	O-linked glycosylation
YDR013W	3.5	0.7	DNA dependent DNA replication
YER149C	3.5	0.57	Rho protein signal transduction
YGR188C	3.5	0.71	mitotic spindle checkpoint
YJL074C	3.5	0.74	mitotic sister chromatid cohesion
YJR054W	3.5	0.84	biological_process unknown
YKL089W	3.5	0.57	mitotic spindle assembly (sensu Saccharomyces)
YLR154C	3.5	0.9	biological_process unknown
YLR303W	3.5	0.24	methionine metabolism
YMR048W	3.5	0.84	meiotic chromosome segregation
YOR058C	3.5	0.18	mitotic anaphase B
YOR229W	3.5	0.21	regulation of meiosis
YOR273C	3.5	0.45	polyamine transport
YPL124W	3.5	0.81	microtubule nucleation
YAR008W	3.6	0.78	tRNA splicing
YBR088C	3.6	0.58	base-excision repair
YCR042C	3.6	0.28	G1-specific transcription in mitotic cell cycle
YGL175C	3.6	0.48	meiotic DNA double-strand break processing
YKL129C	3.6	0.3	cell wall organization and biogenesis
YML109W	3.6	0.59	cell aging (sensu Saccharomyces)
YMR295C	3.6	0.36	biological_process unknown
YNL309W	3.6	0.68	G1/S transition of mitotic cell cycle
YOR018W	3.6	0.21	response to drug
YOR074C	3.6	0.69	DNA dependent DNA replication
YOR114W	3.6	0.79	biological_process unknown
YPR075C	3.6	0.49	cell cycle arrest in response to pheromone
YAL044C	3.7	0.2	one-carbon compound metabolism
YBL035C	3.7	0.76	DNA replication initiation
YDL018C	3.7	0.79	secretory pathway
YDR097C	3.7	0.72	mismatch repair
YDR481C	3.7	0.49	histone dephosphorylation
YFL060C	3.7	0.88	pyridoxine metabolism
YGL184C	3.7	0.25	methionine biosynthesis
YIL026C	3.7	0.76	colony morphology
YJL194W	3.7	0.44	pre-replicative complex formation and maintenance
YKL052C	3.7	0.31	mitotic spindle assembly (sensu Saccharomyces)
YLR273C	3.7	0.5	regulation of glycogen biosynthesis
YLR382C	3.7	0.67	RNA splicing
YNL206C	3.7	0.73	negative regulation of DNA transposition
YNL272C	3.7	0.61	exocytosis
YOR176W	3.7	0.79	heme biosynthesis
YDR297W	3.8	0.7	sphingolipid biosynthesis
YGR153W	3.8	0.65	biological_process unknown
YHR149C	3.8	0.51	biological_process unknown
YHR154W	3.8	0.63	negative regulation of DNA transposition
YIL140W	3.8	0.65	axial budding
YMR199W	3.8	0.66	regulation of CDK activity
YNL262W	3.8	0.65	DNA repair synthesis
YOL090W	3.8	0.74	DNA recombination
YOR075W	3.8	0.37	nonselective vesicle fusion
YER016W	3.9	0.73	microtubule depolymerization
YHR153C	3.9	0.67	sporulation (sensu Saccharomyces)
YIL066C	3.9	0.81	DNA replication
YPL004C	3.9	0.27	biological_process unknown
YBR162C	4	0.28	biological_process unknown
YCR065W	4	0.72	spindle assembly
YDR222W	4	0.53	biological_process unknown
YJL079C	4	0.29	biological_process unknown
YLR182W	4	0.96	G1/S-specific transcription in mitotic cell cycle
YML110C	4	0.44	aerobic respiration
YMR029C	4	0.51	cell cycle arrest in response to pheromone
YNL304W	4	0.74	mitochondrion inheritance
YOR321W	4	0.8	O-linked glycosylation
YPL032C	4	0.56	endocytosis
YBR041W	4.1	0.37	lipid transport
YKL113C	4.1	0.72	DNA repair
YLR210W	4.1	0.76	G2/M transition of mitotic cell cycle
YLR212C	4.1	0.71	microtubule nucleation
YLR343W	4.1	0.57	biological_process unknown
YNL166C	4.1	0.73	cytokinesis
YDR480W	4.2	0.31	invasive growth
YGL061C	4.2	0.88	mitotic spindle assembly (sensu Saccharomyces)
YJL159W	4.2	0.41	cell wall organization and biogenesis
YJR006W	4.2	0.85	base-excision repair
YKL008C	4.2	0.59	aging
YLR151C	4.2	0.63	biological_process unknown
YMR011W	4.2	0.42	hexose transport
YNL165W	4.2	0.61	biological_process unknown
YNL231C	4.2	0.77	phospholipid transport
YOR033C	4.2	0.79	mismatch repair
YPR141C	4.2	0.43	karyogamy during conjugation with cellular fusion
YBR015C	4.3	0.69	protein amino acid glycosylation
YBR161W	4.3	0.51	biological_process unknown
YDR279W	4.3	0.79	biological_process unknown
YEL061C	4.3	0.62	mitotic anaphase B
YGL028C	4.3	0.18	cytokinesis, completion of separation
YGR140W	4.3	0.63	chromosome segregation
YLR079W	4.3	0.21	G1/S transition of mitotic cell cycle
YNL088W	4.3	0.55	DNA strand elongation
YAR007C	4.4	0.71	DNA recombination
YBR070C	4.4	0.76	biological_process unknown
YDR400W	4.4	0.75	pyrimidine salvage
YGL027C	4.4	0.72	cell wall organization and biogenesis
YGL038C	4.4	0.57	N-linked glycoprotein maturation
YLR342W	4.4	0.61	beta-1,3 glucan biosynthesis
YPL003W	4.4	0.25	RUB1-protein conjugation
YBR087W	4.5	0.62	leading strand elongation
YOL007C	4.5	0.61	biological_process unknown
YDR307W	4.6	0.69	biological_process unknown
YDR501W	4.6	0.77	biological_process unknown
YER118C	4.6	0.72	osmosensory signaling pathway via Sho1 osmosensor
YJL091C	4.6	0.89	GPI anchor biosynthesis
YJL118W	4.6	0.56	biological_process unknown
YJL201W	4.6	0.64	cell wall organization and biogenesis
YMR253C	4.6	0.28	biological_process unknown
YNL310C	4.6	0.57	biological_process unknown
YHL028W	4.7	0.24	Rho protein signal transduction
YJL173C	4.7	0.88	DNA recombination
YJL198W	4.7	0.27	phosphate transport
YKL067W	4.7	0.74	DNA metabolism
YMR031C	4.7	0.27	biological_process unknown
YOR153W	4.7	0.31	drug transport
YBR054W	4.8	0.2	biological_process unknown
YJL187C	4.8	0.66	G2/M transition of mitotic cell cycle
YKL127W	4.8	0.59	glucose 1-phosphate utilization
YLR326W	4.8	0.86	biological_process unknown
YLR455W	4.8	0.61	biological_process unknown
YNL197C	4.8	0.39	regulation of cell size
YNL312W	4.8	0.68	DNA recombination
YDL027C	4.9	0.24	biological_process unknown
YDR144C	4.9	0.95	proteolysis and peptidolysis
YDR488C	4.9	0.58	microtubule-based process
YDR518W	4.9	0.7	protein folding
YER001W	4.9	0.61	N-glycan processing
YER070W	4.9	0.34	DNA replication
YGR109C	4.9	0.57	G1/S transition of mitotic cell cycle
YLL041C	4.9	0.39	mitochondrial electron transport, succinate to ubiquinone
YLR058C	4.9	0.2	one-carbon compound metabolism
YLR183C	4.9	0.58	biological_process unknown
YOL069W	4.9	0.24	chromosome segregation
YOR327C	4.9	0.64	Golgi to plasma membrane transport
YOR372C	4.9	0.82	G2/M-specific transcription in mitotic cell cycle
YOR373W	4.9	0.9	microtubule nucleation
YDR001C	5	0.19	response to stress
YKL164C	5	0.19	cell wall organization and biogenesis
YKL185W	5	0.24	pseudohyphal growth
YKR090W	5	0.66	biological_process unknown
YLR050C	5	0.62	biological_process unknown
YPR052C	5	0.19	establishment and/or maintenance of chromatin architecture
YBL052C	5.1	0.3	chromatin modification
YDR150W	5.1	0.36	microtubule cytoskeleton organization and biogenesis
YKL209C	5.1	0.19	peptide pheromone export
YLL032C	5.1	0.25	biological_process unknown
YMR183C	5.1	0.24	Golgi to plasma membrane transport
YNL263C	5.1	0.75	ER to Golgi transport
YOL147C	5.1	0.74	peroxisome organization and biogenesis
YOR288C	5.1	0.73	protein folding
YPL163C	5.1	0.3	response to chemical substance
YPR106W	5.1	0.23	biological_process unknown
YBL009W	5.2	0.8	meiosis
YBR008C	5.2	0.6	response to toxin
YJL092W	5.2	0.82	DNA repair
YJR148W	5.2	0.41	amino acid catabolism
YKL101W	5.2	0.59	G2/M transition of mitotic cell cycle
YLR373C	5.2	0.91	vacuolar protein catabolism
YML021C	5.2	0.7	DNA repair
YMR190C	5.2	0.53	DNA unwinding
YPL256C	5.2	0.58	re-entry into mitotic cell cycle after pheromone arrest
YDR379W	5.3	0.21	actin filament organization
YGR113W	5.3	0.53	mitotic spindle assembly (sensu Saccharomyces)
YLR049C	5.3	0.48	biological_process unknown
YMR144W	5.3	0.88	biological_process unknown
YNL037C	5.3	0.4	glutamate biosynthesis
YNL126W	5.3	0.57	microtubule nucleation
YOR127W	5.3	0.25	actin filament organization
YBR086C	5.4	0.28	response to osmotic stress
YDR507C	5.4	0.66	axial budding
YKL029C	5.4	0.37	amino acid metabolism
YNL087W	5.4	0.52	biological_process unknown
YNR009W	5.4	0.64	biological_process unknown
YAL007C	5.5	0.67	ER to Golgi transport
YBR183W	5.5	0.19	ceramide metabolism
YNL116W	5.5	0.53	biological_process unknown
YDR089W	5.6	0.34	membrane organization and biogenesis
YDR261C	5.6	0.47	biological_process unknown
YDR346C	5.6	0.34	biological_process unknown
YKL049C	5.6	0.56	mitotic chromosome segregation
YKL175W	5.6	0.21	zinc ion homeostasis
YML027W	5.6	0.4	negative regulation of transcription from Pol II promoter, mitotic
YBL063W	5.7	0.7	microtubule nucleation
YDR219C	5.7	0.54	ubiquitin-dependent protein catabolism
YLR045C	5.7	0.75	microtubule nucleation
YNL289W	5.7	0.43	cell cycle
YBL085W	5.8	0.63	Rho protein signal transduction
YER114C	5.8	0.4	Rho protein signal transduction
YJL097W	5.8	0.68	biological_process unknown
YJR003C	5.8	0.23	biological_process unknown
YOR084W	5.8	0.73	peroxisome organization and biogenesis
YBR093C	5.9	0.25	cellular response to phosphate starvation
YHR151C	5.9	0.22	biological_process unknown
YLR209C	5.9	0.23	purine nucleoside catabolism
YCL027W	6	0.26	conjugation with cellular fusion
YGL139W	6	0.29	biological_process unknown
YHL026C	6	0.2	biological_process unknown
YPR104C	6	0.68	rRNA processing
YHR061C	6.1	0.57	Rho protein signal transduction
YKL183W	6.1	0.29	biological_process unknown
YNL078W	6.1	0.19	regulation of mitosis
YDR451C	6.2	0.34	negative regulation of transcription from Pol II promoter
YGR086C	6.2	0.22	biological_process unknown
YNL176C	6.2	0.47	biological_process unknown
YNL283C	6.2	0.5	Rho protein signal transduction
YOR188W	6.2	0.6	establishment of cell polarity (sensu Saccharomyces)
YDL003W	6.3	0.45	mitotic chromosome condensation
YIL132C	6.3	0.84	meiotic chromosome segregation
YOR152C	6.3	0.25	biological_process unknown
YOR326W	6.3	0.63	apical bud growth
YAR018C	6.4	0.22	chromosome segregation
YDR245W	6.4	0.42	N-glycan processing
YGR089W	6.4	0.33	biological_process unknown
YIL159W	6.4	0.84	actin filament organization
YJR112W	6.4	0.37	chromosome segregation
YML125C	6.4	0.31	biological_process unknown
YOR023C	6.4	0.24	nucleosome disassembly
YGL065C	6.5	0.6	oligosaccharide-lipid intermediate assembly
YHR135C	6.5	0.4	cellular morphogenesis
YOR073W	6.5	0.64	biological_process unknown
YPL253C	6.5	0.66	microtubule-based process
YBR092C	6.6	0.23	thiamin transport
YDR179C	6.6	0.66	adaptation to pheromone during conjugation with cellular fusion
YGL216W	6.6	0.5	microtubule depolymerization
YPL128C	6.6	0.32	loss of chromatin silencing
YGL008C	6.7	0.19	proton transport
YGL083W	6.7	0.29	biological_process unknown
YLR083C	6.7	0.35	transport
YBR139W	6.8	0.25	biological_process unknown
YCR084C	6.8	0.43	negative regulation of transcription
YEL036C	6.8	0.39	N-linked glycosylation
YGR098C	6.8	0.62	mitotic sister chromatid separation
YJR001W	6.8	0.55	neutral amino acid transport
YBL082C	6.9	0.5	dolichol-linked oligosaccharide biosynthesis
YGR099W	6.9	0.6	telomerase-dependent telomere maintenance
YLR437C	6.9	0.35	biological_process unknown
YML064C	6.9	0.31	M phase of mitotic cell cycle
YMR163C	6.9	0.44	biological_process unknown
YKL048C	7	0.47	axial budding
YBR184W	7.1	0.47	biological_process unknown
YBR187W	7.1	0.52	biological_process unknown
YLR131C	7.1	0.18	G1-specific transcription in mitotic cell cycle
YMR292W	7.1	0.67	ER to Golgi transport
YBL031W	7.2	0.93	biological_process unknown
YER003C	7.2	0.55	GDP-mannose biosynthesis
YHR137W	7.2	0.24	aromatic amino acid family metabolism
YPL075W	7.2	0.32	positive regulation of glycolysis
YKL130C	7.3	0.32	mRNA localization, intracellular
YNL238W	7.3	0.37	peptide pheromone maturation
YPL127C	7.3	0.49	regulation of transcription, DNA-dependent
YCR034W	7.4	0.4	fatty acid elongation
YGR014W	7.4	0.42	establishment of cell polarity (sensu Saccharomyces)
YHR023W	7.4	0.26	axial budding
YIR010W	7.4	0.54	chromosome segregation
YJL134W	7.4	0.34	calcium-mediated signaling
YLL031C	7.4	0.65	GPI anchor biosynthesis
YMR055C	7.4	0.47	mitotic spindle checkpoint
YDL157C	7.5	0.64	biological_process unknown
YER032W	7.5	0.29	mRNA polyadenylation
YKR010C	7.5	0.61	DNA topological change
YKR037C	7.5	0.59	microtubule nucleation
YLR335W	7.5	0.37	NLS-bearing substrate-nucleus import
YLR438W	7.5	0.3	arginine catabolism
YOR129C	7.5	0.27	biological_process unknown
YBR138C	7.6	0.21	biological_process unknown
YDR302W	7.6	0.77	GPI anchor biosynthesis
YJL137C	7.6	0.38	glycogen biosynthesis
YOR233W	7.6	0.48	biological_process unknown
YML034W	7.7	0.26	mitotic sister chromatid separation
YHR108W	7.8	0.41	Golgi to vacuole transport
YML085C	7.8	0.41	homologous chromosome segregation
YMR274C	7.8	0.42	peptide pheromone maturation
YIL169C	7.9	0.23	biological_process unknown
YKL004W	7.9	0.37	sphingolipid metabolism
YOR307C	7.9	0.48	ER to Golgi transport
YBR010W	8	0.34	chromatin assembly/disassembly
YDR227W	8.1	0.5	cell aging (sensu Saccharomyces)
YFR039C	8.1	0.32	biological_process unknown
YML065W	8.1	0.66	DNA replication initiation
YNL031C	8.1	0.34	chromatin assembly/disassembly
YNL141W	8.1	0.25	adenine catabolism
YDR147W	8.2	0.28	phosphatidylethanolamine biosynthesis
YDR325W	8.2	0.5	mitotic chromosome condensation
YNL058C	8.2	0.2	biological_process unknown
YDR281C	8.3	0.38	biological_process unknown
YIL106W	8.3	0.2	protein amino acid phosphorylation
YJL183W	8.3	0.57	protein amino acid glycosylation
YNL099C	8.3	0.45	response to oxidative stress
YBR133C	8.4	0.22	G2/M transition of mitotic cell cycle
YCL014W	8.4	0.21	axial budding
YKL096W	8.4	0.22	cell wall organization and biogenesis
YLR047C	8.4	0.84	biological_process unknown
YPL116W	8.5	0.55	histone deacetylation
YDL155W	8.6	0.72	G1/S transition of mitotic cell cycle
YDR019C	8.6	0.28	glycine metabolism
YDR224C	8.6	0.28	chromatin assembly/disassembly
YEL042W	8.6	0.58	protein amino acid glycosylation
YGL116W	8.6	0.19	cyclin catabolism
YIL123W	8.6	0.56	microtubule cytoskeleton organization and biogenesis
YPR004C	8.6	0.4	biological_process unknown
YPL155C	8.7	0.24	microtubule stabilization
YIL131C	8.8	0.4	chromatin silencing at HML and HMR (sensu Saccharomyces)
YDR225W	8.9	0.29	chromatin assembly/disassembly
YHR086W	9	0.45	mRNA splice site selection
YMR215W	9	0.38	biological_process unknown
YOL012C	9	0.46	chromatin silencing at HML and HMR (sensu Saccharomyces)
YOR246C	9	0.37	biological_process unknown
YMR198W	9.1	0.3	meiosis
YPL141C	9.1	0.22	biological_process unknown
YBR243C	9.2	0.66	N-linked glycosylation
YFR028C	9.2	0.37	DNA dependent DNA replication
YHR152W	9.2	0.21	meiosis I
YJR076C	9.2	0.62	axial budding
YBR078W	9.3	0.51	cell wall organization and biogenesis
YOL030W	9.3	0.37	biological_process unknown
YBL002W	9.4	0.3	chromatin assembly/disassembly
YGL021W	9.5	0.24	mitosis
YNL068C	9.6	0.35	G2-specific transcription in mitotic cell cycle
YBR009C	9.9	0.31	chromatin assembly/disassembly
YKL069W	10	0.36	biological_process unknown
YEL017W	10.1	0.5	biological_process unknown
YML124C	10.1	0.46	homologous chromosome segregation
YJL051W	10.2	0.23	biological_process unknown
YBL003C	10.3	0.27	chromatin assembly/disassembly
YML058W	10.4	0.2	mitochondrion organization and biogenesis
YBR123C	10.5	0.58	transcription initiation from Pol III promoter
YOR247W	10.6	0.38	nucleobase, nucleoside, nucleotide and nucleic acid metabolism
YFL017C	10.7	0.31	UDP-N-acetylglucosamine biosynthesis
YOL088C	11.1	0.4	protein folding
YPL242C	11.1	0.22	actin filament organization
YML119W	11.2	0.21	biological_process unknown
YMR003W	11.4	0.34	biological_process unknown
YNL216W	11.4	0.58	chromatin silencing
YBL032W	11.7	0.22	mRNA localization, intracellular
YCL063W	11.7	0.72	vacuole inheritance
YER170W	12.3	0.79	biological_process unknown
YDR146C	12.4	0.23	G1-specific transcription in mitotic cell cycle
YMR189W	12.5	0.28	one-carbon compound metabolism
YPL227C	12.6	0.67	N-linked glycosylation
YMR001C	12.9	0.23	DNA dependent DNA replication
YLR190W	15.5	0.21	biological_process unknown
YKL035W	15.7	0.5	UDP-glucose metabolism
YBR038W	18.1	0.19	cytokinesis
YOR315W	18.7	0.2	biological_process unknown
YIL158W	18.8	0.22	biological_process unknown
YJR092W	19	0.23	axial budding
YMR032W	20.3	0.19	cytokinesis
YGR108W	20.5	0.23	G2/M transition of mitotic cell cycle
YPR119W	20.6	0.21	G2/M transition of mitotic cell cycle
YOR025W	22	0.21	chromatin silencing at telomere
YML052W	26.7	0.21	sporulation (sensu Saccharomyces)
YJL158C	30.8	0.43	cell wall organization and biogenesis
