# Supplementary material for: Stochastic Modeling of Expression Kinetics Identifies Messenger Half-Lives and Reveals Sequential Waves of Co-ordinated Transcription and Decay
Source: PLoS Comput Biol. 2012 Nov 8;8(11):e1002772. doi: 10.1371/journal.pcbi.1002772 (PMC3493476; doi:10.1371/journal.pcbi.1002772)
Supplement: Table S4 — DRAGON estimated half-lives using Orlando replicate 2 dataset. (XLSX) [file pcbi.1002772.s010.xlsx]

## Sheet: Foglio1
Orf	hl (min)	Ci (normalized to max=1)	Annotation
YLR273C	1.6	0.41	regulation of glycogen biosynthesis
YDL105W	1.9	0.53	biological_process unknown
YMR075W	1.9	0.25	biological_process unknown
YNL231C	2	0.28	phospholipid transport
YGR042W	2.2	0.33	biological_process unknown
YDL089W	2.3	0.34	biological_process unknown
YDL138W	2.3	0.29	response to glucose stimulus
YGR238C	2.3	0.53	conjugation with cellular fusion
YMR029C	2.3	0.41	cell cycle arrest in response to pheromone
YPL221W	2.3	0.73	biological_process unknown
YOR075W	2.4	0.4	nonselective vesicle fusion
YLR254C	2.6	0.31	biological_process unknown
YML069W	2.6	0.28	DNA dependent DNA replication
YML020W	2.7	0.66	biological_process unknown
YDR191W	2.8	0.55	chromatin silencing at telomere
YDR503C	2.8	0.89	phospholipid metabolism
YNL304W	2.8	0.86	mitochondrion inheritance
YDL103C	2.9	0.69	UDP-N-acetylglucosamine biosynthesis
YDL156W	2.9	0.8	biological_process unknown
YER170W	2.9	0.89	biological_process unknown
YNL309W	2.9	0.8	G1/S transition of mitotic cell cycle
YBL112C	3	0.72	biological_process unknown
YCL027W	3	0.42	conjugation with cellular fusion
YER111C	3	0.8	G1/S transition of mitotic cell cycle
YLR121C	3	0.82	protein metabolism
YPL153C	3	0.86	DNA repair
YBR071W	3.1	0.67	biological_process unknown
YBR200W	3.1	0.25	cellular morphogenesis during conjugation with cellular fusion
YER095W	3.1	0.84	chromatin modeling
YJL019W	3.1	0.87	nuclear migration during conjugation with cellular fusion
YJR006W	3.1	0.54	base-excision repair
YLL041C	3.1	0.3	mitochondrial electron transport, succinate to ubiquinone
YLR032W	3.1	0.85	DNA repair
YNL099C	3.1	0.28	response to oxidative stress
YNL165W	3.1	0.66	biological_process unknown
YPR075C	3.1	0.51	cell cycle arrest in response to pheromone
YPR157W	3.1	0.52	biological_process unknown
YDL127W	3.2	0.56	cell cycle
YFL060C	3.2	0.41	pyridoxine metabolism
YGL163C	3.2	0.84	chromatin modeling
YNL310C	3.2	0.81	biological_process unknown
YOR288C	3.2	0.89	protein folding
YPL124W	3.2	0.9	microtubule nucleation
YBR275C	3.3	0.88	chromatin silencing at telomere
YKL048C	3.3	0.33	axial budding
YLR382C	3.3	0.64	RNA splicing
YMR179W	3.3	0.84	regulation of transcription from Pol II promoter
YOR066W	3.3	0.51	biological_process unknown
YOR114W	3.3	0.76	biological_process unknown
YPR018W	3.3	0.78	nucleosome assembly
YPR135W	3.3	0.8	DNA dependent DNA replication
YAR007C	3.4	0.9	DNA recombination
YBR296C	3.4	0.43	phosphate transport
YDR013W	3.4	0.66	DNA dependent DNA replication
YFL065C	3.4	0.69	biological_process unknown
YGR089W	3.4	0.28	biological_process unknown
YIL066C	3.4	0.31	DNA replication
YKL163W	3.4	0.29	cell wall organization and biogenesis
YLR297W	3.4	0.44	biological_process unknown
YNL082W	3.4	0.79	meiosis
YPL014W	3.4	0.75	biological_process unknown
YPL267W	3.4	0.77	biological_process unknown
YAL053W	3.5	0.71	biological_process unknown
YAR003W	3.5	0.79	chromatin silencing at telomere
YCR065W	3.5	0.83	spindle assembly
YDL018C	3.5	0.84	secretory pathway
YEL076C	3.5	0.77	biological_process unknown
YFL064C	3.5	0.7	biological_process unknown
YGL184C	3.5	0.7	methionine biosynthesis
YJL115W	3.5	0.86	DNA damage response, signal transduction resulting in induction of apoptosis
YLR050C	3.5	0.68	biological_process unknown
YOL088C	3.5	0.32	protein folding
YDL197C	3.6	0.81	chromatin silencing at HML and HMR (sensu Saccharomyces)
YEL076C-A	3.6	0.77	biological_process unknown
YGL038C	3.6	0.67	N-linked glycoprotein maturation
YGR153W	3.6	0.89	biological_process unknown
YIL132C	3.6	0.75	meiotic chromosome segregation
YKL045W	3.6	0.83	DNA repair synthesis
YKL089W	3.6	0.89	mitotic spindle assembly (sensu Saccharomyces)
YLR313C	3.6	0.86	Rho protein signal transduction
YML021C	3.6	0.79	DNA repair
YNL273W	3.6	0.81	DNA topological change
YOR284W	3.6	0.88	biological_process unknown
YDR307W	3.7	0.82	biological_process unknown
YGR138C	3.7	0.44	polyamine transport
YMR048W	3.7	0.79	meiotic chromosome segregation
YNL272C	3.7	0.59	exocytosis
YOR033C	3.7	0.87	mismatch repair
YDL038C	3.8	0.41	biological_process unknown
YGR221C	3.8	0.84	biological_process unknown
YIL159W	3.8	0.82	actin filament organization
YLR151C	3.8	0.81	biological_process unknown
YNL206C	3.8	0.67	negative regulation of DNA transposition
YOL090W	3.8	0.85	DNA recombination
YOL147C	3.8	0.75	peroxisome organization and biogenesis
YOR195W	3.8	0.85	meiosis
YCL061C	3.9	0.91	DNA replication checkpoint
YDL164C	3.9	0.84	DNA ligation
YFL008W	3.9	0.67	mitotic chromosome segregation
YJL073W	3.9	0.73	karyogamy during conjugation with cellular fusion
YJR043C	3.9	0.83	base-excision repair
YKR090W	3.9	0.8	biological_process unknown
YLR103C	3.9	0.75	DNA replication initiation
YBR161W	4	0.96	biological_process unknown
YCL024W	4	0.74	axial budding
YGR143W	4	0.34	beta-1,6 glucan biosynthesis
YIL026C	4	0.75	colony morphology
YLR183C	4	0.68	biological_process unknown
YLR383W	4	0.83	DNA repair
YNL263C	4	0.62	ER to Golgi transport
YNL289W	4	0.61	cell cycle
YOL017W	4	0.7	chromatin silencing
YDL093W	4.1	0.82	O-linked glycosylation
YHR154W	4.1	0.78	negative regulation of DNA transposition
YLR274W	4.1	0.43	DNA replication initiation
YLR343W	4.1	0.66	biological_process unknown
YML061C	4.1	0.91	DNA recombination
YMR008C	4.1	0.43	glycerophospholipid metabolism
YMR199W	4.1	0.73	regulation of CDK activity
YNR044W	4.1	0.38	agglutination during conjugation with cellular fusion
YPL208W	4.1	0.89	biological_process unknown
YPR175W	4.1	0.77	lagging strand elongation
YBL023C	4.2	0.52	DNA replication initiation
YDR222W	4.2	0.46	biological_process unknown
YDR480W	4.2	0.93	invasive growth
YGL065C	4.2	0.85	oligosaccharide-lipid intermediate assembly
YGR109C	4.2	0.74	G1/S transition of mitotic cell cycle
YKL104C	4.2	0.29	cell wall chitin biosynthesis
YML027W	4.2	0.66	negative regulation of transcription from Pol II promoter, mitotic
YMR078C	4.2	0.89	sister chromatid cohesion
YNL233W	4.2	0.83	cytokinesis
YBR073W	4.3	0.81	double-strand break repair via break-induced replication
YBR184W	4.3	0.93	biological_process unknown
YDL101C	4.3	0.76	DNA damage response, signal transduction resulting in cell cycle arrest
YGR188C	4.3	0.84	mitotic spindle checkpoint
YJL074C	4.3	0.81	mitotic sister chromatid cohesion
YJL194W	4.3	0.45	pre-replicative complex formation and maintenance
YKL067W	4.3	0.92	DNA metabolism
YKR037C	4.3	0.81	microtubule nucleation
YOL006C	4.3	0.31	DNA strand elongation
YOR074C	4.3	0.68	DNA dependent DNA replication
YOR084W	4.3	1	peroxisome organization and biogenesis
YPR174C	4.3	0.81	biological_process unknown
YBR083W	4.4	0.3	positive regulation of transcription from Pol II promoter
YDR147W	4.4	0.31	phosphatidylethanolamine biosynthesis
YHR153C	4.4	0.84	sporulation (sensu Saccharomyces)
YJL044C	4.4	0.31	intracellular protein transport
YJL187C	4.4	0.82	G2/M transition of mitotic cell cycle
YJL201W	4.4	0.69	cell wall organization and biogenesis
YJR030C	4.4	0.76	biological_process unknown
YKL113C	4.4	0.86	DNA repair
YNL053W	4.4	0.33	adaptation to pheromone during conjugation with cellular fusion
YPL256C	4.4	0.69	re-entry into mitotic cell cycle after pheromone arrest
YAR008W	4.5	0.75	tRNA splicing
YBL113C	4.5	0.67	biological_process unknown
YDR097C	4.5	0.78	mismatch repair
YKL049C	4.5	0.88	mitotic chromosome segregation
YLL022C	4.5	0.86	biological_process unknown
YOR144C	4.5	0.73	negative regulation of DNA recombination
YPR104C	4.5	0.52	rRNA processing
YDL003W	4.6	0.65	mitotic chromosome condensation
YDR219C	4.6	0.57	ubiquitin-dependent protein catabolism
YDR279W	4.6	0.64	biological_process unknown
YDR507C	4.6	0.74	axial budding
YER016W	4.6	0.87	microtubule depolymerization
YGL032C	4.6	0.25	agglutination during conjugation with cellular fusion
YGL175C	4.6	0.67	meiotic DNA double-strand break processing
YNL072W	4.6	0.78	DNA replication
YNL312W	4.6	0.88	DNA recombination
YDR179C	4.7	0.73	adaptation to pheromone during conjugation with cellular fusion
YDR501W	4.7	0.72	biological_process unknown
YGL201C	4.7	0.46	DNA replication initiation
YHR005C	4.7	0.37	signal transduction during conjugation with cellular fusion
YHR149C	4.7	0.75	biological_process unknown
YIL140W	4.7	0.69	axial budding
YKL042W	4.7	0.61	microtubule nucleation
YKL109W	4.7	0.38	regulation of carbohydrate metabolism
YLL012W	4.7	0.44	biological_process unknown
YLR326W	4.7	0.83	biological_process unknown
YNL181W	4.7	0.73	biological_process unknown
YOR229W	4.7	0.38	regulation of meiosis
YOR342C	4.7	0.58	biological_process unknown
YPL255W	4.7	0.8	microtubule nucleation
YKL029C	4.8	0.46	amino acid metabolism
YNL262W	4.8	0.83	DNA repair synthesis
YOR127W	4.8	0.44	actin filament organization
YOR176W	4.8	0.3	heme biosynthesis
YPL075W	4.8	0.28	positive regulation of glycolysis
YBR041W	4.9	0.67	lipid transport
YEL047C	4.9	0.81	metabolism
YGL027C	4.9	0.89	cell wall organization and biogenesis
YGL061C	4.9	0.87	mitotic spindle assembly (sensu Saccharomyces)
YKR010C	4.9	0.46	DNA topological change
YLR058C	4.9	0.41	one-carbon compound metabolism
YML064C	4.9	0.34	M phase of mitotic cell cycle
YPR159W	4.9	0.77	beta-1,6 glucan biosynthesis
YBL031W	5	0.86	biological_process unknown
YEL060C	5	0.26	cellular response to starvation
YJR054W	5	0.82	biological_process unknown
YMR055C	5	0.43	mitotic spindle checkpoint
YPR019W	5	0.44	DNA replication initiation
YBL035C	5.1	0.7	DNA replication initiation
YBR070C	5.1	0.76	biological_process unknown
YDL155W	5.1	0.83	G1/S transition of mitotic cell cycle
YEL032W	5.1	0.52	DNA replication initiation
YGR113W	5.1	0.56	mitotic spindle assembly (sensu Saccharomyces)
YML109W	5.1	0.83	cell aging (sensu Saccharomyces)
YMR076C	5.1	0.72	mitotic chromosome condensation
YOL007C	5.1	0.68	biological_process unknown
YGL257C	5.2	0.33	O-linked glycosylation
YJL091C	5.2	0.65	GPI anchor biosynthesis
YKL101W	5.2	0.7	G2/M transition of mitotic cell cycle
YNL102W	5.2	0.72	DNA repair synthesis
YOR321W	5.2	0.66	O-linked glycosylation
YDL102W	5.3	0.67	base-excision repair
YDR518W	5.3	0.72	protein folding
YGR230W	5.3	0.3	meiosis
YHL026C	5.3	0.4	biological_process unknown
YJR137C	5.3	0.62	cell wall organization and biogenesis
YDR400W	5.4	0.85	pyrimidine salvage
YFL044C	5.4	0.26	biological_process unknown
YLR212C	5.4	0.8	microtubule nucleation
YMR011W	5.4	0.3	hexose transport
YDR309C	5.5	0.69	Rho protein signal transduction
YDR528W	5.5	0.52	cell wall organization and biogenesis
YGL083W	5.5	0.44	biological_process unknown
YGR140W	5.5	0.81	chromosome segregation
YNL126W	5.5	0.81	microtubule nucleation
YOR373W	5.5	0.9	microtubule nucleation
YPR141C	5.5	0.8	karyogamy during conjugation with cellular fusion
YBL111C	5.6	0.61	biological_process unknown
YDR488C	5.6	0.85	microtubule-based process
YER001W	5.6	0.8	N-glycan processing
YHL030W	5.6	0.3	cell wall organization and biogenesis
YJL164C	5.6	0.26	RAS protein signal transduction
YLR154C	5.6	0.66	biological_process unknown
YMR006C	5.6	0.41	glycerophospholipid metabolism
YMR031C	5.6	0.31	biological_process unknown
YMR144W	5.6	0.8	biological_process unknown
YGR152C	5.7	0.78	axial budding
YGR189C	5.7	0.64	biological_process unknown
YHR086W	5.7	0.8	mRNA splice site selection
YLR335W	5.7	0.45	NLS-bearing substrate-nucleus import
YMR238W	5.7	0.79	cell wall biosynthesis (sensu Fungi)
YOR233W	5.7	0.47	biological_process unknown
YMR163C	5.8	0.77	biological_process unknown
YNL166C	5.8	0.77	cytokinesis
YCR042C	5.9	0.28	G1-specific transcription in mitotic cell cycle
YDR227W	5.9	0.45	cell aging (sensu Saccharomyces)
YJL159W	5.9	0.32	cell wall organization and biogenesis
YKR013W	5.9	0.71	biological_process unknown
YNR050C	5.9	0.47	lysine biosynthesis, aminoadipic pathway
YPL092W	5.9	0.47	sulfite transport
YPL163C	5.9	0.73	response to chemical substance
YBR015C	6	0.78	protein amino acid glycosylation
YBR202W	6	0.43	DNA replication initiation
YER114C	6	0.48	Rho protein signal transduction
YGR099W	6	0.88	telomerase-dependent telomere maintenance
YHR151C	6	0.36	biological_process unknown
YAL040C	6.1	0.34	G1/S transition of mitotic cell cycle
YDR461W	6.1	0.39	signal transduction during conjugation with cellular fusion
YER018C	6.1	0.87	chromosome segregation
YKL008C	6.1	0.71	aging
YLR057W	6.1	0.37	biological_process unknown
YNL238W	6.1	0.83	peptide pheromone maturation
YOR083W	6.1	0.66	regulation of cell size
YEL061C	6.2	0.78	mitotic anaphase B
YGR041W	6.2	0.37	bud site selection
YLR270W	6.2	0.31	deadenylation-dependent decapping
YOR307C	6.2	0.46	ER to Golgi transport
YPL004C	6.2	0.3	biological_process unknown
YPR004C	6.2	0.57	biological_process unknown
YER118C	6.3	0.82	osmosensory signaling pathway via Sho1 osmosensor
YKL069W	6.3	0.45	biological_process unknown
YNL068C	6.3	0.53	G2-specific transcription in mitotic cell cycle
YBL063W	6.4	0.87	microtubule nucleation
YBR008C	6.4	0.66	response to toxin
YDR281C	6.4	0.41	biological_process unknown
YEL040W	6.4	0.56	cell wall organization and biogenesis
YGL099W	6.4	0.5	conjugation with cellular fusion
YJL079C	6.4	0.39	biological_process unknown
YLR373C	6.4	0.85	vacuolar protein catabolism
YGL216W	6.5	0.8	microtubule depolymerization
YGR092W	6.5	0.35	nuclear division
YHL028W	6.5	0.43	Rho protein signal transduction
YJL118W	6.5	0.71	biological_process unknown
YLR455W	6.5	0.58	biological_process unknown
YOR327C	6.5	0.28	Golgi to plasma membrane transport
YIL009W	6.6	0.39	N-terminal protein myristoylation
YML060W	6.6	0.71	DNA repair
YBR087W	6.7	0.71	leading strand elongation
YBR088C	6.7	0.75	base-excision repair
YER042W	6.7	0.6	response to oxidative stress
YIL118W	6.7	0.44	actin filament organization
YKL209C	6.7	0.31	peptide pheromone export
YMR183C	6.7	0.44	Golgi to plasma membrane transport
YOR372C	6.7	0.74	G2/M-specific transcription in mitotic cell cycle
YPL253C	6.7	0.74	microtubule-based process
YKL165C	6.8	0.79	GPI anchor biosynthesis
YDR325W	6.9	0.72	mitotic chromosome condensation
YJL173C	6.9	0.85	DNA recombination
YOL069W	6.9	0.45	chromosome segregation
YOR188W	6.9	0.65	establishment of cell polarity (sensu Saccharomyces)
YOR246C	6.9	0.51	biological_process unknown
YDR261C	7	0.83	biological_process unknown
YDR451C	7	0.67	negative regulation of transcription from Pol II promoter
YJL097W	7	0.73	biological_process unknown
YJR112W	7	0.75	chromosome segregation
YNL116W	7	0.45	biological_process unknown
YBL009W	7.1	0.84	meiosis
YDR481C	7.1	0.34	histone dephosphorylation
YHR061C	7.1	0.71	Rho protein signal transduction
YLL021W	7.1	0.79	Rho protein signal transduction
YNL088W	7.1	0.86	DNA strand elongation
YEL036C	7.2	0.6	N-linked glycosylation
YLR049C	7.3	0.34	biological_process unknown
YMR274C	7.3	0.59	peptide pheromone maturation
YNL176C	7.3	0.67	biological_process unknown
YNL216W	7.3	0.33	chromatin silencing
YPL116W	7.3	0.84	histone deacetylation
YGL101W	7.4	0.58	biological_process unknown
YGR098C	7.4	0.8	mitotic sister chromatid separation
YMR198W	7.4	0.7	meiosis
YNL197C	7.4	0.5	regulation of cell size
YNR009W	7.4	0.51	biological_process unknown
YOL019W	7.4	0.48	biological_process unknown
YIR010W	7.5	0.7	chromosome segregation
YJL134W	7.5	0.57	calcium-mediated signaling
YMR190C	7.5	0.68	DNA unwinding
YHR135C	7.6	0.43	cellular morphogenesis
YLR210W	7.6	0.82	G2/M transition of mitotic cell cycle
YOR073W	7.6	0.77	biological_process unknown
YPL227C	7.6	0.79	N-linked glycosylation
YDL124W	7.7	0.35	biological_process unknown
YHR104W	7.7	0.3	arabinose metabolism
YKL052C	7.7	0.52	mitotic spindle assembly (sensu Saccharomyces)
YKL116C	7.7	0.32	MAPKKK cascade
YML119W	7.7	0.4	biological_process unknown
YPL127C	7.7	0.67	regulation of transcription, DNA-dependent
YMR003W	7.8	0.58	biological_process unknown
YDR302W	7.9	0.79	GPI anchor biosynthesis
YJR001W	7.9	0.82	neutral amino acid transport
YDR144C	8	0.7	proteolysis and peptidolysis
YML125C	8	0.53	biological_process unknown
YOR313C	8	0.47	DNA metabolism
YPR106W	8	0.52	biological_process unknown
YCL040W	8.1	0.29	carbohydrate metabolism
YJL092W	8.1	0.61	DNA repair
YJL137C	8.1	0.72	glycogen biosynthesis
YKL096W	8.1	0.32	cell wall organization and biogenesis
YLR182W	8.2	0.76	G1/S-specific transcription in mitotic cell cycle
YOL158C	8.2	0.38	ferric-enterobactin transport
YBR243C	8.3	0.83	N-linked glycosylation
YER070W	8.3	0.72	DNA replication
YMR189W	8.3	0.35	one-carbon compound metabolism
YBR133C	8.4	0.68	G2/M transition of mitotic cell cycle
YGL139W	8.4	0.6	biological_process unknown
YNL145W	8.4	0.35	signal transduction during conjugation with cellular fusion
YOL014W	8.4	0.37	biological_process unknown
YAL007C	8.5	0.83	ER to Golgi transport
YHR146W	8.5	0.5	biological_process unknown
YIL131C	8.5	0.67	chromatin silencing at HML and HMR (sensu Saccharomyces)
YJR003C	8.5	0.45	biological_process unknown
YLR045C	8.5	0.72	microtubule nucleation
YMR305C	8.5	0.77	conjugation with cellular fusion
YNL037C	8.5	0.66	glutamate biosynthesis
YBL085W	8.6	0.83	Rho protein signal transduction
YML065W	8.6	0.67	DNA replication initiation
YOL030W	8.6	0.57	biological_process unknown
YDR502C	8.7	0.47	methionine metabolism
YGR014W	8.7	0.82	establishment of cell polarity (sensu Saccharomyces)
YBL052C	8.8	0.47	chromatin modification
YBR056W	8.8	0.28	biological_process unknown
YDL157C	8.8	0.76	biological_process unknown
YDR224C	8.8	0.91	chromatin assembly/disassembly
YFR028C	8.8	0.3	DNA dependent DNA replication
YBL082C	8.9	0.62	dolichol-linked oligosaccharide biosynthesis
YDR019C	8.9	0.25	glycine metabolism
YLL031C	8.9	0.73	GPI anchor biosynthesis
YMR295C	8.9	0.63	biological_process unknown
YNL283C	8.9	0.64	Rho protein signal transduction
YBR054W	9	0.28	biological_process unknown
YDR001C	9	0.28	response to stress
YDR346C	9.2	0.52	biological_process unknown
YGL037C	9.2	0.25	cell aging (sensu Saccharomyces)
YBR010W	9.3	0.91	chromatin assembly/disassembly
YNL192W	9.3	0.27	budding
YDR245W	9.4	0.66	N-glycan processing
YKL127W	9.4	0.68	glucose 1-phosphate utilization
YLR209C	9.4	0.83	purine nucleoside catabolism
YML100W	9.4	0.49	response to stress
YBR123C	9.5	0.4	transcription initiation from Pol III promoter
YGR044C	9.5	0.27	meiosis
YHR108W	9.5	0.73	Golgi to vacuole transport
YJR076C	9.5	0.53	axial budding
YLR303W	9.5	0.49	methionine metabolism
YNL141W	9.5	0.64	adenine catabolism
YDR089W	9.6	0.64	membrane organization and biogenesis
YHR143W	9.6	0.26	cell wall organization and biogenesis
YJL157C	9.6	0.36	cell cycle arrest
YKL130C	9.6	0.53	mRNA localization, intracellular
YKL183W	9.6	0.45	biological_process unknown
YNL031C	9.6	0.81	chromatin assembly/disassembly
YPL032C	9.6	0.74	endocytosis
YPL128C	9.6	0.58	loss of chromatin silencing
YHL021C	9.7	0.41	biological_process unknown
YKL151C	9.7	0.27	biological_process unknown
YNL300W	9.7	0.68	biological_process unknown
YBR139W	9.8	0.28	biological_process unknown
YLR438W	9.8	0.3	arginine catabolism
YOR129C	9.8	0.63	biological_process unknown
YBL002W	9.9	0.75	chromatin assembly/disassembly
YBR093C	9.9	0.26	cellular response to phosphate starvation
YGR086C	9.9	0.33	biological_process unknown
YLL032C	9.9	0.52	biological_process unknown
YBR138C	10	0.46	biological_process unknown
YCL063W	10	0.56	vacuole inheritance
YIL106W	10	0.43	protein amino acid phosphorylation
YOR326W	10	0.62	apical bud growth
YBL003C	10.1	0.61	chromatin assembly/disassembly
YDR297W	10.1	0.73	sphingolipid biosynthesis
YOR374W	10.1	0.28	ethanol metabolism
YLR084C	10.2	0.5	bud site selection
YLR437C	10.2	0.64	biological_process unknown
YPR052C	10.2	0.43	establishment and/or maintenance of chromatin architecture
YFL017C	10.3	0.77	UDP-N-acetylglucosamine biosynthesis
YJL198W	10.3	0.78	phosphate transport
YPL155C	10.3	0.54	microtubule stabilization
YNL327W	10.5	0.27	cytokinesis
YER003C	10.6	0.83	GDP-mannose biosynthesis
YGL008C	10.6	0.59	proton transport
YCL014W	10.7	0.51	axial budding
YJL051W	10.7	0.39	biological_process unknown
YER032W	10.8	0.7	mRNA polyadenylation
YNL087W	10.8	0.63	biological_process unknown
YDR171W	10.9	0.45	cytoskeleton organization and biogenesis
YDR225W	10.9	0.77	chromatin assembly/disassembly
YEL017W	10.9	0.7	biological_process unknown
YJL078C	10.9	0.27	biological_process unknown
YKL035W	10.9	0.35	UDP-glucose metabolism
YLR079W	10.9	0.3	G1/S transition of mitotic cell cycle
YOR153W	10.9	0.39	drug transport
YCL064C	11	0.4	serine family amino acid catabolism
YPL141C	11	0.44	biological_process unknown
YAR018C	11.1	0.36	chromosome segregation
YDR146C	11.1	0.33	G1-specific transcription in mitotic cell cycle
YML034W	11.1	0.44	mitotic sister chromatid separation
YMR215W	11.1	0.6	biological_process unknown
YHR023W	11.2	0.42	axial budding
YMR292W	11.2	0.76	ER to Golgi transport
YOR315W	11.2	0.37	biological_process unknown
YBR009C	11.3	0.73	chromatin assembly/disassembly
YIL123W	11.4	0.59	microtubule cytoskeleton organization and biogenesis
YML052W	11.4	0.46	sporulation (sensu Saccharomyces)
YOR058C	11.4	0.45	mitotic anaphase B
YIL158W	11.5	0.38	biological_process unknown
YLR083C	11.5	0.61	transport
YLR342W	11.5	0.85	beta-1,3 glucan biosynthesis
YGR108W	11.6	0.33	G2/M transition of mitotic cell cycle
YBR092C	11.7	0.43	thiamin transport
YLR131C	11.7	0.43	G1-specific transcription in mitotic cell cycle
YMR001C	11.7	0.42	DNA dependent DNA replication
YGL116W	11.9	0.38	cyclin catabolism
YML124C	11.9	0.63	homologous chromosome segregation
YOL070C	11.9	0.36	biological_process unknown
YPR119W	11.9	0.35	G2/M transition of mitotic cell cycle
YCR034W	12	0.58	fatty acid elongation
YGL021W	12	0.36	mitosis
YKL210W	12	0.31	ubiquitin cycle
YBR158W	12.1	0.28	mitotic checkpoint
YPL242C	12.1	0.41	actin filament organization
YBR086C	12.2	0.74	response to osmotic stress
YHR152W	12.3	0.37	meiosis I
YOR247W	12.3	0.65	nucleobase, nucleoside, nucleotide and nucleic acid metabolism
YLR194C	12.4	0.3	biological_process unknown
YML058W	12.4	0.54	mitochondrion organization and biogenesis
YOR025W	12.4	0.39	chromatin silencing at telomere
YBL032W	12.5	0.52	mRNA localization, intracellular
YJR092W	12.5	0.37	axial budding
YKL004W	12.5	0.54	sphingolipid metabolism
YOL012C	12.6	0.78	chromatin silencing at HML and HMR (sensu Saccharomyces)
YDR077W	12.7	0.26	cell wall organization and biogenesis
YEL065W	12.7	0.35	iron ion homeostasis
YML085C	12.7	0.75	homologous chromosome segregation
YMR032W	12.7	0.31	cytokinesis
YMR251W-A	12.7	0.34	response to stress
YDR150W	12.8	0.6	microtubule cytoskeleton organization and biogenesis
YBR038W	13.2	0.35	cytokinesis
YPR149W	13.3	0.34	protein secretion
YLR190W	13.5	0.39	biological_process unknown
YGL028C	13.8	0.25	cytokinesis, completion of separation
YCR084C	13.9	0.39	negative regulation of transcription
YER091C	13.9	0.83	methionine biosynthesis
YDL022W	14.4	0.33	intracellular accumulation of glycerol
YEL042W	14.4	0.69	protein amino acid glycosylation
YNL078W	14.4	0.27	regulation of mitosis
YBR078W	14.6	0.57	cell wall organization and biogenesis
YJL183W	14.7	0.64	protein amino acid glycosylation
YBR067C	14.9	0.3	cell wall organization and biogenesis
YBR187W	15.1	0.71	biological_process unknown
YNL058C	15.2	0.32	biological_process unknown
YJL158C	15.3	0.61	cell wall organization and biogenesis
YML072C	15.3	0.51	biological_process unknown
YPL265W	15.3	0.29	amino acid transport
YKL185W	15.4	0.27	pseudohyphal growth
YLR180W	15.5	0.74	methionine metabolism
YLR214W	16.2	0.3	copper ion import
YPL158C	16.8	0.25	biological_process unknown
YAR071W	18.3	0.44	phosphate metabolism
YKL164C	18.4	0.3	cell wall organization and biogenesis
YEL071W	19.8	0.25	lactate metabolism
YBR162C	21.6	0.61	biological_process unknown
