# Supplementary material for: Stochastic Modeling of Expression Kinetics Identifies Messenger Half-Lives and Reveals Sequential Waves of Co-ordinated Transcription and Decay
Source: PLoS Comput Biol. 2012 Nov 8;8(11):e1002772. doi: 10.1371/journal.pcbi.1002772 (PMC3493476; doi:10.1371/journal.pcbi.1002772)
Supplement: Table S5 — DRAGON estimated half-lives using metabolic cycle dataset. (XLSX) [file pcbi.1002772.s011.xlsx]

## Sheet: Foglio1
Orf	hl (min)	Ci (normalized to max=1)	Annotation
YLR329W	1.9	0.58	meiotic DNA double-strand break formation
YGL063W	1.9	0.42	tRNA modification
YNL082W	1.9	0.49	meiosis
YEL065W	2	0.43	iron ion homeostasis
YDR528W	2.1	0.49	cell wall organization and biogenesis
YGL088W	2.1	0.55	biological_process unknown
YMR179W	2.1	0.78	regulation of transcription from Pol II promoter
YMR084W	2.1	0.54	biological_process unknown
YPR124W	2.1	0.6	copper ion import
YDR263C	2.2	0.61	DNA repair
YJL073W	2.2	0.66	karyogamy during conjugation with cellular fusion
YOL007C	2.3	0.46	biological_process unknown
YLR313C	2.3	0.57	Rho protein signal transduction
YCL061C	2.3	0.5	DNA replication checkpoint
YOL017W	2.3	0.55	chromatin silencing
YJR030C	2.4	0.81	biological_process unknown
YDR440W	2.4	0.62	chromatin silencing at telomere
YOR366W	2.5	0.62	biological_process unknown
YHR153C	2.5	0.49	sporulation (sensu Saccharomyces)
YMR132C	2.5	0.6	biological_process unknown
YOL131W	2.6	0.41	biological_process unknown
YBR243C	2.7	0.68	N-linked glycosylation
YDR414C	2.7	0.52	protein-ER retention
YOR037W	2.8	0.56	mitochondrial intermembrane space protein import
YNL196C	2.8	0.54	biological_process unknown
YPL255W	2.8	0.65	microtubule nucleation
YJR158W	2.8	0.75	hexose transport
YFR025C	2.8	0.44	histidine biosynthesis
YDL003W	2.9	0.57	mitotic chromosome condensation
YOR074C	2.9	0.74	DNA dependent DNA replication
YOR074C	2.9	0.74	DNA dependent DNA replication
YDL156W	2.9	0.42	biological_process unknown
YEL040W	2.9	0.6	cell wall organization and biogenesis
YOR033C	3	0.64	mismatch repair
YKL155C	3	0.6	protein biosynthesis
YOL090W	3	0.72	DNA recombination
YLR183C	3.1	0.58	biological_process unknown
YBR205W	3.1	0.44	N-linked glycosylation
YPL267W	3.1	0.51	biological_process unknown
YCR006C	3.1	0.76	biological_process unknown
YCR098C	3.1	0.49	phospholipid transport
YOR392W	3.1	0.6	biological_process unknown
YJR114W	3.1	0.6	biological_process unknown
YDL164C	3.2	0.81	DNA ligation
YBR156C	3.2	0.75	chromosome segregation
YKL101W	3.2	0.66	G2/M transition of mitotic cell cycle
YMR195W	3.2	0.47	biological_process unknown
YLR462W	3.2	0.59	biological_process unknown
YKR077W	3.2	0.43	biological_process unknown
YDR393W	3.3	0.82	inner mitochondrial membrane organization and biogenesis
YJL108C	3.3	0.53	conjugation with cellular fusion
YLR191W	3.3	0.4	peroxisome organization and biogenesis
YDR444W	3.3	0.51	biological_process unknown
YPR175W	3.4	0.63	lagging strand elongation
YOR134W	3.4	0.55	small GTPase mediated signal transduction
YDR261C	3.4	0.67	biological_process unknown
YLR296W	3.4	0.59	biological_process unknown
YPL256C	3.5	0.49	re-entry into mitotic cell cycle after pheromone arrest
YDR438W	3.5	0.74	biological_process unknown
YPL124W	3.5	0.78	microtubule nucleation
YMR007W	3.5	0.76	biological_process unknown
YMR048W	3.5	0.55	meiotic chromosome segregation
YLR332W	3.5	0.48	cell wall organization and biogenesis
YDR515W	3.5	0.68	copper ion homeostasis
YNL213C	3.5	0.51	mitochondrion organization and biogenesis
YFL052W	3.6	0.84	biological_process unknown
YIR042C	3.6	0.7	biological_process unknown
YER019W	3.6	0.71	salinity response
YBL021C	3.6	0.7	regulation of carbohydrate metabolism
YGR023W	3.6	0.42	cell wall organization and biogenesis
YGR172C	3.6	0.58	vesicle-mediated transport
YBR275C	3.7	0.68	chromatin silencing at telomere
YFR007W	3.7	0.94	biological_process unknown
YDR376W	3.7	0.9	heme a biosynthesis
YJR020W	3.7	0.65	biological_process unknown
YOL062C	3.7	0.53	intracellular protein transport
YBR088C	3.7	0.75	base-excision repair
YPL103C	3.8	0.86	biological_process unknown
YGL179C	3.8	0.47	biological_process unknown
YDL044C	3.8	0.71	mRNA processing
YOL031C	3.9	0.61	SRP-dependent cotranslational membrane targeting, translocation
YLR394W	3.9	0.84	DNA replication and chromosome cycle
YMR098C	3.9	0.74	biological_process unknown
YJL046W	3.9	0.69	biological_process unknown
YPL265W	3.9	0.51	amino acid transport
YKL134C	3.9	0.6	iron ion homeostasis
YJL104W	3.9	0.79	biological_process unknown
YGL064C	4	0.73	ribosome biogenesis
YLR103C	4	0.7	DNA replication initiation
YDR113C	4	0.64	mitotic sister chromatid separation
YBR157C	4	0.51	biological_process unknown
YPL017C	4	0.71	biological_process unknown
YEL008W	4	0.41	biological_process unknown
YDR235W	4	0.55	mRNA splicing
YBL031W	4	0.61	biological_process unknown
YGR112W	4	0.83	respiratory gaseous exchange
YJL074C	4.1	0.93	mitotic sister chromatid cohesion
YBR076W	4.1	0.52	cell wall organization and biogenesis
YDR480W	4.1	0.89	invasive growth
YHR109W	4.1	0.89	protein modification
YHR176W	4.1	0.91	protein folding
YMR054W	4.1	0.74	vacuolar acidification
YGR028W	4.1	0.87	mitochondrial translocation
YJL213W	4.2	0.83	biological_process unknown
YCR024C	4.2	0.88	protein biosynthesis
YOR205C	4.2	0.56	biological_process unknown
YIL134W	4.2	0.67	mitochondrial transport
YMR279C	4.2	0.67	biological_process unknown
YLR289W	4.2	0.89	biological_process unknown
YBR192W	4.3	0.57	mitochondrial genome maintenance
YJL181W	4.3	0.51	biological_process unknown
YMR078C	4.3	0.6	sister chromatid cohesion
YML087C	4.3	0.58	biological_process unknown
YMR198W	4.3	0.45	meiosis
YOR299W	4.3	0.45	bud site selection
YKL055C	4.3	0.42	aerobic respiration
YBR044C	4.4	0.73	protein complex assembly
YOR158W	4.4	0.82	protein biosynthesis
YER175C	4.4	0.5	biological_process unknown
YPL163C	4.5	0.61	response to chemical substance
YDR268W	4.5	0.86	tryptophanyl-tRNA aminoacylation
YNL289W	4.5	0.47	cell cycle
YKL194C	4.5	0.88	threonyl-tRNA aminoacylation
YNR040W	4.5	0.84	biological_process unknown
YCR065W	4.5	0.61	spindle assembly
YPR018W	4.5	0.58	nucleosome assembly
YDR218C	4.5	0.42	cell wall organization and biogenesis
YAL007C	4.5	0.74	ER to Golgi transport
YNL179C	4.5	0.66	biological_process unknown
YLR077W	4.5	0.72	biological_process unknown
YFL036W	4.5	0.55	mitochondrial genome maintenance
YBR133C	4.5	0.51	G2/M transition of mitotic cell cycle
YPL241C	4.6	0.84	microtubule-based process
YBR007C	4.6	0.6	biological_process unknown
YJL218W	4.6	0.72	biological_process unknown
YBL009W	4.6	0.63	meiosis
YHR149C	4.6	0.46	biological_process unknown
YJL118W	4.6	0.55	biological_process unknown
YDL243C	4.6	0.52	aldehyde metabolism
YMR286W	4.6	0.66	protein biosynthesis
YER018C	4.6	0.83	chromosome segregation
YGR032W	4.6	0.46	beta-1,3 glucan biosynthesis
YBL037W	4.6	0.61	vesicle-mediated transport
YOL019W	4.6	0.6	biological_process unknown
YFL041W	4.7	0.7	iron ion transport
YDL052C	4.7	0.7	sphingolipid biosynthesis
YDR309C	4.7	0.54	Rho protein signal transduction
YJR101W	4.7	0.81	protein biosynthesis
YOR019W	4.7	0.63	biological_process unknown
YIL120W	4.7	0.53	multidrug transport
YIL131C	4.7	0.58	chromatin silencing at HML and HMR (sensu Saccharomyces)
YDL145C	4.8	0.53	ER to Golgi transport
YDR507C	4.8	0.81	axial budding
YKL045W	4.8	0.79	DNA repair synthesis
YLR100W	4.8	0.53	ergosterol biosynthesis
YGL229C	4.8	0.66	G1/S transition of mitotic cell cycle
YCR102C	4.8	0.8	biological_process unknown
YHR011W	4.8	0.88	aerobic respiration
YMR085W	4.8	0.74	biological_process unknown
YER163C	4.9	0.9	biological_process unknown
YER170W	4.9	0.91	biological_process unknown
YJR160C	4.9	0.6	carbohydrate transport
YLR209C	4.9	0.54	purine nucleoside catabolism
YHR024C	4.9	0.77	mitochondrial processing
YGR171C	4.9	0.87	methionyl-tRNA aminoacylation
YBL038W	5	0.88	protein biosynthesis
YDL219W	5	0.57	D-amino acid catabolism
YKR013W	5.1	0.41	biological_process unknown
YOL033W	5.1	0.86	glutamyl-tRNA aminoacylation
YER050C	5.1	0.93	protein biosynthesis
YIL093C	5.1	0.79	protein biosynthesis
YPR047W	5.1	0.84	protein biosynthesis
YBR003W	5.1	0.94	ubiquinone metabolism
YGR257C	5.1	0.77	transport
YML050W	5.1	0.72	biological_process unknown
YPL132W	5.2	0.93	aerobic respiration
YBL090W	5.2	0.88	protein biosynthesis
YDR093W	5.2	0.8	intracellular protein transport
YDR093W	5.2	0.8	intracellular protein transport
YLR239C	5.2	0.91	protein-lipoylation
YNL083W	5.2	0.79	transport
YMR144W	5.2	0.57	biological_process unknown
YDR430C	5.2	0.81	biological_process unknown
YLR267W	5.2	0.71	biological_process unknown
YER118C	5.2	0.56	osmosensory signaling pathway via Sho1 osmosensor
YGL129C	5.2	0.82	protein biosynthesis
YML027W	5.3	0.54	negative regulation of transcription from Pol II promoter, mitotic
YLR383W	5.3	0.71	DNA repair
YDR462W	5.3	0.91	protein biosynthesis
YHR160C	5.3	0.67	protein-peroxisome targeting
YOR040W	5.3	0.43	carbohydrate metabolism
YBR091C	5.3	0.65	mitochondrial translocation
YNL184C	5.3	0.75	biological_process unknown
YGR084C	5.3	0.76	protein biosynthesis
YGL047W	5.3	0.71	biological_process unknown
YLR431C	5.3	0.64	biological_process unknown
YPR011C	5.4	0.88	transport
YER093C-A	5.4	0.95	biological_process unknown
YOR201C	5.4	0.48	rRNA modification
YAR008W	5.4	0.72	tRNA splicing
YER087W	5.4	0.87	biological_process unknown
YLR382C	5.4	0.81	RNA splicing
YJR080C	5.4	0.8	biological_process unknown
YER093C-A	5.4	0.95	biological_process unknown
YOL053W	5.4	0.9	biological_process unknown
YBR297W	5.4	0.79	carbohydrate metabolism
YIL162W	5.4	0.88	sucrose catabolism
YDR061W	5.5	0.97	biological_process unknown
YDR405W	5.5	0.86	protein biosynthesis
YBL035C	5.5	0.74	DNA replication initiation
YGR021W	5.5	0.85	biological_process unknown
YOR017W	5.5	0.56	RNA processing
YBL107C	5.5	0.54	biological_process unknown
YNL177C	5.5	0.85	aerobic respiration
YBR206W	5.6	0.75	biological_process unknown
YNL081C	5.6	0.92	biological_process unknown
YMR018W	5.6	0.6	biological_process unknown
YDR400W	5.6	0.61	pyrimidine salvage
YIL166C	5.6	0.49	transport
YMR228W	5.6	0.69	transcription from mitochondrial promoter
YHR059W	5.6	0.81	biological_process unknown
YMR215W	5.6	0.77	biological_process unknown
YLR390W	5.7	0.87	cell wall organization and biogenesis
YPL072W	5.7	0.75	protein deubiquitination
YCR002C	5.7	0.71	axial budding
YLR045C	5.7	0.75	microtubule nucleation
YDR097C	5.7	0.68	mismatch repair
YEL052W	5.7	0.6	biological_process unknown
YMR083W	5.7	0.47	fermentation
YML025C	5.8	0.87	protein biosynthesis
YHR172W	5.8	0.66	microtubule nucleation
YJL180C	5.8	0.82	protein complex assembly
YPL097W	5.8	0.84	amino acid activation
YBR282W	5.8	0.88	protein biosynthesis
YHR116W	5.8	0.79	aerobic respiration
YMR166C	5.8	0.85	transport
YDR348C	5.8	0.67	biological_process unknown
YLR163C	5.8	0.88	mitochondrial processing
YDL205C	5.8	0.75	heme biosynthesis
YIL098C	5.8	0.88	protein complex assembly
YPL040C	5.9	0.86	isoleucyl-tRNA aminoacylation
YNR020C	5.9	0.82	biological_process unknown
YDL079C	5.9	0.82	protein amino acid phosphorylation
YAL046C	5.9	0.83	biological_process unknown
YHL028W	5.9	0.67	Rho protein signal transduction
YDL079C	5.9	0.82	protein amino acid phosphorylation
YER017C	5.9	0.55	mitochondrial intermembrane space protein import
YDR316W	6	0.89	biological_process unknown
YBR045C	6	0.57	spore wall assembly (sensu Saccharomyces)
YOR326W	6	0.52	apical bud growth
YMR210W	6	0.8	biological_process unknown
YML102W	6	0.65	DNA repair
YKL087C	6	0.86	cytochrome c-heme linkage
YER070W	6.1	0.62	DNA replication
YKR016W	6.1	0.76	biological_process unknown
YER154W	6.1	0.78	mitochondrial translocation
YDR511W	6.1	0.86	carbon utilization by utilization of organic compounds
YNR009W	6.1	0.65	biological_process unknown
YPL033C	6.1	0.5	DNA metabolism
YJL216C	6.1	0.56	biological_process unknown
YCL049C	6.1	0.77	biological_process unknown
YMR267W	6.1	0.76	respiratory gaseous exchange
YML021C	6.1	0.69	DNA repair
YDL107W	6.1	0.83	mitochondrial translocation
YGL236C	6.2	0.79	protein biosynthesis
YCL012W	6.2	0.7	biological_process unknown
YLR218C	6.2	0.84	biological_process unknown
YJL187C	6.2	0.58	G2/M transition of mitotic cell cycle
YHL004W	6.2	0.89	protein biosynthesis
YMR225C	6.2	0.75	protein biosynthesis
YLR140W	6.2	0.45	biological_process unknown
YDR116C	6.3	0.81	aerobic respiration
YOR198C	6.3	0.5	bud growth
YLR177W	6.3	0.7	biological_process unknown
YHR038W	6.3	0.89	protein biosynthesis
YCR071C	6.4	0.88	protein biosynthesis
YOR354C	6.4	0.8	meiotic recombination
YLR153C	6.4	0.44	acetyl-CoA biosynthesis
YIR039C	6.4	0.65	biological_process unknown
YNL270C	6.4	0.59	basic amino acid transport
YPL258C	6.4	0.81	thiamin biosynthesis
YDR534C	6.4	0.59	siderochrome transport
YBR037C	6.5	0.94	copper ion transport
YNR033W	6.5	0.62	para-aminobenzoic acid metabolism
YLR023C	6.5	0.61	biological_process unknown
YFR051C	6.5	0.6	ER to Golgi transport
YBR161W	6.5	0.46	biological_process unknown
YDR493W	6.6	0.92	biological_process unknown
YOR382W	6.6	0.69	siderochrome transport
YDL045W-A	6.6	0.92	protein biosynthesis
YJR122W	6.6	0.78	biological_process unknown
YPL200W	6.6	0.65	meiotic chromosome segregation
YNR022C	6.6	0.78	protein biosynthesis
YMR017W	6.6	0.74	nonselective vesicle fusion
YBR120C	6.6	0.87	protein biosynthesis
YNL298W	6.6	0.68	Rho protein signal transduction
YPL172C	6.7	0.89	heme a biosynthesis
YDR375C	6.7	0.88	aerobic respiration
YPL118W	6.7	0.86	protein biosynthesis
YNL233W	6.7	0.55	cytokinesis
YKL127W	6.7	0.65	glucose 1-phosphate utilization
YAR018C	6.7	0.55	chromosome segregation
YGR165W	6.7	0.86	aerobic respiration
YKR053C	6.7	0.66	sphingolipid biosynthesis
YBR138C	6.7	0.61	biological_process unknown
YOR180C	6.7	0.56	fatty acid beta-oxidation
YBL043W	6.8	0.77	cell wall organization and biogenesis
YGL143C	6.8	0.69	protein biosynthesis
YMR012W	6.8	0.75	mitochondrion organization and biogenesis
YHR147C	6.8	0.88	protein biosynthesis
YOR136W	6.8	0.78	glutamate biosynthesis
YPL104W	6.9	0.9	protein biosynthesis
YLR090W	6.9	0.85	biological_process unknown
YNL102W	6.9	0.81	DNA repair synthesis
YLR204W	6.9	0.86	biological_process unknown
YER001W	6.9	0.55	N-glycan processing
YHR209W	6.9	0.72	biological_process unknown
YFR020W	6.9	0.75	biological_process unknown
YDL202W	7	0.81	protein biosynthesis
YMR188C	7	0.87	aerobic respiration
YKL165C	7	0.85	GPI anchor biosynthesis
YBR122C	7	0.91	protein biosynthesis
YDR494W	7	0.79	biological_process unknown
YDR322C-A	7	0.65	ATP synthesis coupled proton transport
YMR147W	7	0.46	biological_process unknown
YNL306W	7	0.78	protein biosynthesis
YDR175C	7.1	0.83	aerobic respiration
YLR312W-A	7.1	0.86	protein biosynthesis
YFR011C	7.1	0.76	biological_process unknown
YML119W	7.1	0.63	biological_process unknown
YHR061C	7.1	0.61	Rho protein signal transduction
YOR232W	7.1	0.7	mitochondrial translocation
YMR199W	7.2	0.7	regulation of CDK activity
YKL218C	7.2	0.74	biological_process unknown
YIL157C	7.2	0.82	biological_process unknown
YJL132W	7.2	0.71	biological_process unknown
YBR066C	7.2	0.57	invasive growth
YGL040C	7.3	0.92	heme biosynthesis
YJL143W	7.3	0.76	mitochondrial translocation
YPL013C	7.3	0.75	protein biosynthesis
YMR058W	7.4	0.67	high affinity iron ion transport
YML091C	7.4	0.74	mitochondrion organization and biogenesis
YBR136W	7.4	0.54	DNA damage response, signal transduction resulting in cell cycle arrest
YBR220C	7.4	0.48	biological_process unknown
YNR017W	7.5	0.61	mitochondrial translocation
YDL178W	7.5	0.73	biological_process unknown
YKL138C	7.5	0.9	protein biosynthesis
YNL252C	7.5	0.83	protein biosynthesis
YOL101C	7.5	0.44	biological_process unknown
YNL012W	7.5	0.57	meiosis
YGR174C	7.5	0.83	protein complex assembly
YER058W	7.6	0.79	cytochrome c oxidase biogenesis
YJR133W	7.6	0.56	purine nucleotide biosynthesis
YIL022W	7.6	0.8	mitochondrial translocation
YPL277C	7.6	0.64	biological_process unknown
YGR181W	7.6	0.67	mitochondrial translocation
YPL173W	7.7	0.93	protein biosynthesis
YKR085C	7.7	0.84	mitochondrial genome maintenance
YMR193W	7.7	0.78	protein biosynthesis
YKL167C	7.7	0.86	protein biosynthesis
YCR018C	7.7	0.52	rRNA processing
YNL185C	7.8	0.79	protein biosynthesis
YMR158W	7.8	0.8	protein biosynthesis
YDR536W	7.8	0.84	transport
YGL107C	7.8	0.86	biological_process unknown
YJL063C	7.8	0.82	mitochondrial genome maintenance
YJR113C	7.8	0.81	protein biosynthesis
YNL262W	7.8	0.87	DNA repair synthesis
YNL117W	7.8	0.47	glyoxylate cycle
YDR194C	7.9	0.89	RNA splicing
YJL096W	7.9	0.88	protein biosynthesis
YMR053C	7.9	0.62	histone deacetylation
YCR003W	8	0.84	protein biosynthesis
YDR237W	8	0.88	protein biosynthesis
YLR253W	8	0.84	biological_process unknown
YDR041W	8	0.9	protein biosynthesis
YBR029C	8	0.49	phosphatidylglycerol biosynthesis
YDR322W	8.1	0.84	protein biosynthesis
YDR296W	8.1	0.87	mitochondrial genome maintenance
YPL215W	8.1	0.81	protein complex assembly
YNL283C	8.1	0.81	Rho protein signal transduction
YLR008C	8.1	0.74	biological_process unknown
YBR262C	8.1	0.8	biological_process unknown
YLR203C	8.1	0.83	mRNA processing
YFL010C	8.1	0.67	response to dessication
YGR076C	8.1	0.75	protein biosynthesis
YLR349W	8.1	0.68	biological_process unknown
YNL137C	8.1	0.8	protein biosynthesis
YDR347W	8.2	0.85	protein biosynthesis
YPR166C	8.2	0.8	protein biosynthesis
YMR024W	8.2	0.83	protein biosynthesis
YMR157C	8.2	0.81	biological_process unknown
YDL095W	8.2	0.73	O-linked glycosylation
YER043C	8.2	0.55	methionine metabolism
YDR453C	8.2	0.8	regulation of redox homeostasis
YFL045C	8.2	0.48	protein-ER targeting
YNR037C	8.3	0.85	protein biosynthesis
YDR451C	8.3	0.45	negative regulation of transcription from Pol II promoter
YKL192C	8.3	0.76	fatty acid biosynthesis
YGR067C	8.3	0.77	biological_process unknown
YNL052W	8.3	0.56	aerobic respiration
YOR144C	8.4	0.59	negative regulation of DNA recombination
YPR150W	8.4	0.6	biological_process unknown
YML124C	8.4	0.79	homologous chromosome segregation
YKL195W	8.4	0.84	biological_process unknown
YGR014W	8.4	0.78	establishment of cell polarity (sensu Saccharomyces)
YIL055C	8.4	0.66	biological_process unknown
YKR097W	8.4	0.76	gluconeogenesis
YMR104C	8.4	0.7	protein amino acid phosphorylation
YNL300W	8.5	0.56	biological_process unknown
YEL050C	8.5	0.87	fatty acid metabolism
YKR006C	8.5	0.85	protein biosynthesis
YGR052W	8.5	0.59	biological_process unknown
YMR271C	8.5	0.63	pyrimidine base biosynthesis
YGR092W	8.5	0.58	nuclear division
YJL158C	8.6	0.69	cell wall organization and biogenesis
YDR331W	8.6	0.64	attachment of GPI anchor to protein
YLR168C	8.7	0.65	biological_process unknown
YJL092W	8.7	0.71	DNA repair
YKL053C-A	8.7	0.71	mitochondrion organization and biogenesis
YBR185C	8.8	0.83	aerobic respiration
YDR408C	8.8	0.57	adenine biosynthesis
YMR180C	8.8	0.74	RNA processing
YBR225W	8.8	0.7	biological_process unknown
YPR133W-A	8.9	0.76	mitochondrial translocation
YOR152C	8.9	0.66	biological_process unknown
YKL170W	8.9	0.83	protein biosynthesis
YGR082W	9	0.82	mitochondrial translocation
YOR177C	9	0.67	spore wall assembly (sensu Saccharomyces)
YOL012C	9	0.7	chromatin silencing at HML and HMR (sensu Saccharomyces)
YKL137W	9	0.76	biological_process unknown
YPR100W	9	0.75	aerobic respiration
YGR194C	9	0.86	xylulose catabolism
YCR005C	9.1	0.5	citrate metabolism
YER158C	9.1	0.55	biological_process unknown
YDR337W	9.1	0.77	protein biosynthesis
YPL242C	9.1	0.72	actin filament organization
YCR046C	9.2	0.82	protein biosynthesis
YIL070C	9.2	0.66	aerobic respiration
YLR069C	9.4	0.75	translational elongation
YNL284C	9.4	0.84	protein biosynthesis
YER065C	9.4	0.56	glyoxylate cycle
YIL123W	9.4	0.63	microtubule cytoskeleton organization and biogenesis
YDR223W	9.4	0.68	biological_process unknown
YML078W	9.4	0.44	protein folding
YML129C	9.4	0.74	aerobic respiration
YMR164C	9.4	0.61	positive regulation of transcription from Pol II promoter
YLL009C	9.5	0.64	cytochrome c oxidase biogenesis
YBR146W	9.5	0.76	protein biosynthesis
YHL040C	9.5	0.56	iron-siderochrome transport
YJR092W	9.5	0.59	axial budding
YMR203W	9.5	0.65	mitochondrial translocation
YPL183W-A	9.5	0.82	protein biosynthesis
YDR234W	9.5	0.5	lysine biosynthesis, aminoadipic pathway
YPR113W	9.6	0.74	phosphatidylinositol biosynthesis
YPL099C	9.6	0.55	biological_process unknown
YMR003W	9.7	0.71	biological_process unknown
YJR143C	9.7	0.7	O-linked glycosylation
YGL068W	9.7	0.66	biological_process unknown
YOL153C	9.7	0.75	biological_process unknown
YLR202C	9.7	0.66	biological_process unknown
YOR100C	9.8	0.73	fatty acid metabolism
YOR150W	9.8	0.78	protein biosynthesis
YLR089C	9.8	0.48	biological_process unknown
YLR273C	9.8	0.75	regulation of glycogen biosynthesis
YLR439W	10	0.83	protein biosynthesis
YKL109W	10	0.79	regulation of carbohydrate metabolism
YOR187W	10	0.79	translational elongation
YLR180W	10	0.69	methionine metabolism
YOL052C	10	0.67	pantothenate biosynthesis
YDR244W	10	0.67	peroxisome organization and biogenesis
YLL056C	10.1	0.53	biological_process unknown
YNL131W	10.1	0.74	mitochondrial translocation
YJR149W	10.1	0.67	biological_process unknown
YDL198C	10.2	0.71	mitochondrial genome maintenance
YJR010W	10.2	0.75	methionine metabolism
YFR015C	10.2	0.82	glycogen metabolism
YPR119W	10.3	0.45	G2/M transition of mitotic cell cycle
YKR075C	10.3	0.82	biological_process unknown
YMR250W	10.3	0.7	glutamate catabolism
YFL030W	10.3	0.62	glyoxylate cycle
YIL113W	10.4	0.63	MAPKKK cascade (cell wall biogenesis)
YGL253W	10.5	0.79	fructose metabolism
YMR114C	10.5	0.77	biological_process unknown
YPL003W	10.5	0.77	RUB1-protein conjugation
YNR050C	10.5	0.57	lysine biosynthesis, aminoadipic pathway
YMR096W	10.5	0.51	pyridoxine metabolism
YKL096W	10.5	0.62	cell wall organization and biogenesis
YGL012W	10.6	0.64	ergosterol biosynthesis
YBL015W	10.7	0.56	acetate metabolism
YDL049C	10.7	0.67	beta-1,6 glucan biosynthesis
YLR182W	10.7	0.52	G1/S-specific transcription in mitotic cell cycle
YER141W	10.7	0.65	cytochrome c oxidase biogenesis
YML009C	10.8	0.78	protein biosynthesis
YNL334C	10.8	0.73	pyridoxine metabolism
YOR045W	10.8	0.65	mitochondrial translocation
YJL163C	10.8	0.74	biological_process unknown
YDR353W	10.9	0.54	regulation of redox homeostasis
YAR015W	10.9	0.43	purine base metabolism
YJL221C	11	0.84	biological_process unknown
YOL100W	11	0.75	MAPKKK cascade (cell wall biogenesis)
YKR091W	11	0.52	nucleobase, nucleoside, nucleotide and nucleic acid metabolism
YMR052C-A	11	0.62	biological_process unknown
YBR132C	11	0.92	fatty acid metabolism
YGR244C	11	0.68	succinyl-CoA metabolism
YIL099W	11.1	0.78	sporulation (sensu Saccharomyces)
YIL099W	11.1	0.78	sporulation (sensu Saccharomyces)
YPR114W	11.2	0.7	biological_process unknown
YFL037W	11.2	0.57	homologous chromosome segregation
YHR152W	11.2	0.72	meiosis I
YBR268W	11.3	0.74	protein biosynthesis
YNL335W	11.3	0.61	biological_process unknown
YLR190W	11.3	0.67	biological_process unknown
YDR115W	11.4	0.82	aerobic respiration
YNL315C	11.4	0.75	protein complex assembly
YER145C	11.5	0.69	high affinity iron ion transport
YDL045C	11.5	0.56	FAD biosynthesis
YOL030W	11.5	0.49	biological_process unknown
YMR244C-A	11.5	0.66	biological_process unknown
YBR162C	11.5	0.44	biological_process unknown
YGR247W	11.6	0.9	DNA metabolism
YAL028W	11.7	0.7	biological_process unknown
YPR061C	11.7	0.49	biological_process unknown
YGL062W	11.8	0.7	NADPH regeneration
YDR098C	11.8	0.59	response to oxidative stress
YJR096W	11.8	0.85	arabinose metabolism
YCR088W	11.8	0.68	actin cortical patch assembly
YNL333W	11.9	0.67	pyridoxine metabolism
YOL086C	11.9	0.48	fermentation
YPR183W	12	0.55	GPI anchor biosynthesis
YKL091C	12	0.95	biological_process unknown
YGL117W	12	0.42	biological_process unknown
YPR002W	12.1	0.69	propionate metabolism
YER003C	12.2	0.78	GDP-mannose biosynthesis
YGL116W	12.2	0.82	cyclin catabolism
YGR230W	12.3	0.63	meiosis
YKR067W	12.4	1	phospholipid biosynthesis
YJR077C	12.5	0.57	phosphate transport
YPR167C	12.5	0.43	methionine metabolism
YPL252C	12.6	0.71	heme a biosynthesis
YJR048W	12.6	0.51	electron transport
YLR359W	12.6	0.56	purine base metabolism
YMR305C	12.7	0.57	conjugation with cellular fusion
YMR001C	12.7	0.55	DNA dependent DNA replication
YBL002W	12.8	0.54	chromatin assembly/disassembly
YPL123C	12.8	0.77	cellular morphogenesis
YCR020C	12.9	0.8	mitochondrion organization and biogenesis
YBR285W	12.9	0.9	biological_process unknown
YER014W	12.9	0.64	heme biosynthesis
YPR155C	12.9	0.73	aerobic respiration
YML030W	13.1	0.82	biological_process unknown
YER054C	13.3	0.77	protein amino acid dephosphorylation
YAL023C	13.3	0.67	O-linked glycosylation
YDL117W	13.3	0.51	cytokinesis
YBR167C	13.3	0.54	rRNA processing
YJL057C	13.4	0.71	biological_process unknown
YJR095W	13.5	0.77	fumarate transport
YML085C	13.5	0.66	homologous chromosome segregation
YOR389W	13.6	0.73	biological_process unknown
YOR389W	13.6	0.73	biological_process unknown
YNL037C	13.7	0.75	glutamate biosynthesis
YNR036C	13.7	0.78	biological_process unknown
YDR226W	13.8	0.78	cell proliferation
YJL153C	13.9	0.66	myo-inositol metabolism
YPL141C	13.9	0.5	biological_process unknown
YIL045W	13.9	0.74	biological_process unknown
YHR150W	14	0.69	peroxisome organization and biogenesis
YJL051W	14.1	0.51	biological_process unknown
YOR324C	14.1	0.68	biological_process unknown
YLR108C	14.1	0.55	biological_process unknown
YER015W	14.1	0.82	N-terminal protein myristoylation
YJR073C	14.2	0.53	phosphatidylcholine biosynthesis
YBR099C	14.3	0.73	biological_process unknown
YGL021W	14.3	0.59	mitosis
YLR446W	14.3	0.7	biological_process unknown
YBL106C	14.3	0.62	Golgi to plasma membrane transport
YGR204W	14.3	0.68	purine base biosynthesis
YDR030C	14.4	0.53	DNA repair
YDR023W	14.4	0.59	amino acid activation
YDR073W	14.4	0.83	chromatin modeling
YOR247W	14.5	0.57	nucleobase, nucleoside, nucleotide and nucleic acid metabolism
YOR247W	14.5	0.57	nucleobase, nucleoside, nucleotide and nucleic acid metabolism
YPL230W	14.5	0.91	biological_process unknown
YOR062C	14.5	0.69	biological_process unknown
YBR168W	14.6	0.76	biological_process unknown
YDR146C	14.7	0.44	G1-specific transcription in mitotic cell cycle
YGR266W	14.7	0.7	biological_process unknown
YBL067C	14.7	0.73	biological_process unknown
YOL065C	14.8	0.82	exocytosis
YLR370C	14.8	0.66	actin filament organization
YNL280C	14.8	0.41	ergosterol biosynthesis
YDL179W	14.9	0.45	cell cycle
YNL100W	14.9	0.74	biological_process unknown
YMR262W	14.9	0.84	biological_process unknown
YPL201C	15	0.86	biological_process unknown
YOR363C	15	0.68	fatty acid metabolism
YNL058C	15.1	0.63	biological_process unknown
YPR160W	15.1	0.95	glycogen catabolism
YLR372W	15.1	0.62	fatty acid biosynthesis
YPL061W	15.2	0.44	acetate biosynthesis
YGR205W	15.3	0.98	biological_process unknown
YOR028C	15.4	0.47	regulation of transcription from Pol II promoter
YPL052W	15.4	0.5	biological_process unknown
YHR171W	15.4	0.8	autophagy
YKL189W	15.4	0.68	cytokinesis, completion of separation
YOR054C	15.5	0.79	G1/S transition of mitotic cell cycle
YJL199C	15.6	0.74	biological_process unknown
YDL174C	15.6	0.69	aerobic respiration
YPL187W	15.7	0.51	response to pheromone during conjugation with cellular fusion
YKL188C	15.7	0.76	fatty acid transport
YBR078W	15.8	0.67	cell wall organization and biogenesis
YBR078W	15.8	0.67	cell wall organization and biogenesis
YML131W	15.8	0.72	biological_process unknown
YPL214C	15.9	0.6	thiamin biosynthesis
YOL032W	15.9	0.81	biological_process unknown
YNL116W	16	0.67	biological_process unknown
YJL217W	16.2	0.66	biological_process unknown
YLR367W	16.2	0.67	protein biosynthesis
YKL032C	16.2	0.69	DNA repair
YML089C	16.2	0.88	biological_process unknown
YLR367W	16.2	0.67	protein biosynthesis
YGR243W	16.3	0.88	biological_process unknown
YDR063W	16.4	0.61	biological_process unknown
YBR137W	16.4	0.75	biological_process unknown
YJR036C	16.5	0.79	protein monoubiquitination
YDL199C	16.6	0.78	biological_process unknown
YGR146C	16.7	0.77	biological_process unknown
YGR088W	16.7	0.53	response to stress
YLR194C	16.7	0.6	biological_process unknown
YDR306C	16.7	0.73	ubiquitin-dependent protein catabolism
YLR070C	16.8	0.98	monosaccharide metabolism
YBR057C	16.8	0.56	premeiotic DNA synthesis
YKL081W	16.9	0.49	translational elongation
YKL081W	16.9	0.49	translational elongation
YJL084C	17	0.46	biological_process unknown
YLR297W	17.1	0.72	biological_process unknown
YDR359C	17.1	0.72	biological_process unknown
YPR074C	17.2	0.64	pentose-phosphate shunt
YDL132W	17.2	0.71	G1/S transition of mitotic cell cycle
YLR342W	17.2	0.65	beta-1,3 glucan biosynthesis
YGR281W	17.3	0.73	response to drug
YHR137W	17.4	0.77	aromatic amino acid family metabolism
YJL078C	17.4	0.42	biological_process unknown
YER091C	17.5	0.69	methionine biosynthesis
YNL239W	17.5	0.89	response to antibiotic
YMR006C	17.5	0.91	glycerophospholipid metabolism
YKL151C	17.6	0.79	biological_process unknown
YDR018C	17.6	0.76	phospholipid biosynthesis
YMR032W	17.7	0.49	cytokinesis
YOR264W	17.7	0.51	biological_process unknown
YKR093W	17.7	0.65	peptide transport
YBR001C	17.7	0.85	response to stress
YLR131C	17.8	0.67	G1-specific transcription in mitotic cell cycle
YDL168W	17.8	0.49	formaldehyde assimilation
YLR448W	17.8	0.45	protein biosynthesis
YNL031C	17.8	0.54	chromatin assembly/disassembly
YIL158W	17.9	0.55	biological_process unknown
YOL084W	17.9	0.61	biological_process unknown
YHL032C	17.9	0.82	glycerol metabolism
YOR141C	17.9	0.67	biological_process unknown
YOL048C	17.9	0.83	biological_process unknown
YJR019C	18	0.79	fatty acid oxidation
YDR055W	18	0.66	biological_process unknown
YBR056W	18	0.63	biological_process unknown
YPL119C	18.1	0.69	mRNA processing
YGL234W	18.1	0.47	purine base metabolism
YAL061W	18.3	0.93	biological_process unknown
YKR058W	18.4	0.76	glycogen biosynthesis
YBR010W	18.5	0.64	chromatin assembly/disassembly
YBR010W	18.5	0.64	chromatin assembly/disassembly
YMR307W	18.5	0.68	cell wall organization and biogenesis
YDR111C	18.5	0.56	biological_process unknown
YER010C	18.5	0.53	biological_process unknown
YPL158C	18.6	0.53	biological_process unknown
YBR158W	18.6	0.44	mitotic checkpoint
YKL187C	18.7	0.75	biological_process unknown
YMR041C	18.7	0.82	biological_process unknown
YDL133W	18.7	0.68	biological_process unknown
YNL115C	18.8	0.78	biological_process unknown
YPR052C	18.9	0.54	establishment and/or maintenance of chromatin architecture
YPR052C	18.9	0.54	establishment and/or maintenance of chromatin architecture
YIL107C	18.9	0.96	fructose 2,6-bisphosphate metabolism
YKL149C	19	0.71	RNA catabolism
YOR084W	19	0.78	peroxisome organization and biogenesis
YMR034C	19	0.52	biological_process unknown
YDR358W	19.1	0.87	Golgi to vacuole transport
YOR044W	19.3	0.53	biological_process unknown
YMR036C	19.4	0.77	G2/M transition of mitotic cell cycle
YOL055C	19.5	0.49	thiamin biosynthesis
YEL020C	19.5	0.62	biological_process unknown
YPR037C	19.5	0.68	protein thiol-disulfide exchange
YLR004C	19.5	0.44	transport
YCL018W	19.6	0.68	leucine biosynthesis
YER121W	19.7	0.77	biological_process unknown
YNL098C	19.7	0.82	RAS protein signal transduction
YMR304W	19.7	0.89	protein deubiquitination
YCL042W	19.7	0.86	biological_process unknown
YPL188W	19.8	0.7	NADPH biosynthesis
YLR264W	19.8	0.45	protein biosynthesis
YLR284C	19.9	0.84	fatty acid beta-oxidation
YIL160C	19.9	0.65	fatty acid beta-oxidation
YMR196W	19.9	0.93	biological_process unknown
YLR270W	19.9	0.88	deadenylation-dependent decapping
YGL196W	19.9	0.68	biological_process unknown
YNL180C	20.2	0.74	Rho protein signal transduction
YML100W	20.2	0.9	response to stress
YBR126C	20.2	0.92	carbohydrate metabolism
YOR289W	20.2	0.8	biological_process unknown
YMR090W	20.3	0.88	biological_process unknown
YNL200C	20.3	0.85	biological_process unknown
YPL177C	20.3	0.48	copper ion homeostasis
YLR205C	20.4	0.6	iron ion homeostasis
YML042W	20.4	0.7	carnitine metabolism
YER090W	20.4	0.44	tryptophan biosynthesis
YPR006C	20.5	0.78	propionate metabolism
YGL028C	20.5	0.44	cytokinesis, completion of separation
YHR106W	20.5	0.93	response to oxidative stress
YER159C	20.5	0.74	negative regulation of transcription from Pol II promoter
YLR056W	20.6	0.45	ergosterol biosynthesis
YLR254C	20.6	0.79	biological_process unknown
YOR273C	20.6	0.89	polyamine transport
YOR120W	20.7	0.9	salinity response
YLR251W	20.8	0.58	biological_process unknown
YJL144W	20.9	0.46	response to dessication
YBR183W	21	0.8	ceramide metabolism
YDR293C	21	0.76	cell wall organization and biogenesis
YER144C	21	0.72	protein deubiquitination
YGR033C	21.1	0.66	biological_process unknown
YDR357C	21.2	0.76	biological_process unknown
YKL026C	21.2	0.85	response to oxidative stress
YBR053C	21.2	0.84	biological_process unknown
YBR280C	21.3	0.85	biological_process unknown
YDR034W-B	21.4	0.69	biological_process unknown
YLR093C	21.4	0.8	nonselective vesicle fusion
YLR258W	21.5	0.77	glycogen metabolism
YDR196C	21.5	0.86	coenzyme A biosynthesis
YML128C	21.6	0.71	meiotic recombination
YLR312C	21.6	0.92	biological_process unknown
YLR348C	21.7	0.77	dicarboxylic acid transport
YMR169C	21.7	0.48	beta-alanine biosynthesis
YMR181C	21.7	0.78	biological_process unknown
YMR169C	21.7	0.48	beta-alanine biosynthesis
YBR269C	21.7	0.86	biological_process unknown
YOR261C	21.7	0.65	ubiquitin-dependent protein catabolism
YEL057C	21.8	0.68	biological_process unknown
YOR383C	21.8	0.66	siderochrome transport
YGR127W	21.8	0.73	biological_process unknown
YPL109C	21.8	0.82	biological_process unknown
YGL205W	21.9	0.8	fatty acid beta-oxidation
YML052W	21.9	0.56	sporulation (sensu Saccharomyces)
YBR047W	21.9	0.51	biological_process unknown
YLR149C	21.9	0.84	biological_process unknown
YMR291W	22	0.8	biological_process unknown
YER067W	22.1	0.7	biological_process unknown
YIL136W	22.2	0.82	biological_process unknown
YGR248W	22.2	0.69	biological_process unknown
YGR130C	22.2	0.88	biological_process unknown
YOR173W	22.5	0.86	biological_process unknown
YBR214W	22.5	0.75	DNA metabolism
YDR246W	22.5	0.8	ER to Golgi transport
YDL083C	22.5	0.44	protein biosynthesis
YOR328W	22.6	0.5	multidrug transport
YJL089W	22.6	0.73	positive regulation of gluconeogenesis
YML004C	22.6	0.9	glutathione metabolism
YDL110C	22.7	0.94	biological_process unknown
YDR380W	22.8	0.9	leucine catabolism
YGL156W	22.8	0.96	carbohydrate metabolism
YPL222W	22.9	0.79	biological_process unknown
YGL080W	23	0.8	biological_process unknown
YHR087W	23	0.73	biological_process unknown
YHR146W	23	0.59	biological_process unknown
YPR001W	23.1	0.58	citrate metabolism
YMR322C	23.3	0.67	biological_process unknown
YGR044C	23.3	0.6	meiosis
YLL028W	23.3	0.51	polyamine transport
YGR043C	23.4	0.69	biological_process unknown
YNL274C	23.4	0.96	metabolism
YER103W	23.4	0.55	SRP-dependent cotranslational membrane targeting, translocation
YDR424C	23.5	0.49	actin filament-based process
YNR067C	23.6	0.42	cytokinesis, completion of separation
YDR171W	23.6	0.72	cytoskeleton organization and biogenesis
YBR038W	23.7	0.55	cytokinesis
YGR161C	23.8	0.66	biological_process unknown
YAR035W	23.8	0.82	alcohol metabolism
YNL195C	23.8	0.67	biological_process unknown
YNL160W	23.8	0.56	response to nutrients
YPL171C	23.9	0.43	biological_process unknown
YOR348C	23.9	0.69	neutral amino acid transport
YLR256W	24	0.71	aerobic respiration
YDL204W	24.1	0.57	biological_process unknown
YDR059C	24.1	0.82	endocytosis
YDR262W	24.1	0.57	biological_process unknown
YPR008W	24.2	0.77	transcription initiation from Pol II promoter
YBR295W	24.3	0.82	copper ion homeostasis
YMR031C	24.3	0.95	biological_process unknown
YCR061W	24.3	0.81	biological_process unknown
YAL034C	24.3	0.75	biological_process unknown
YPL186C	24.4	0.86	biological_process unknown
YPR026W	24.4	0.89	response to stress
YBR256C	24.5	0.49	vitamin B2 biosynthesis
YIL087C	24.5	0.87	biological_process unknown
YBR090C-A	24.6	0.76
YBR090C-A	24.6	0.76
YLR377C	24.8	0.75	gluconeogenesis
YOR007C	24.8	0.66	biological_process unknown
YJR148W	24.9	0.8	amino acid catabolism
YMR136W	24.9	0.88	transcription
YLR327C	25.1	0.68	biological_process unknown
YBR062C	25.1	0.7	biological_process unknown
YER024W	25.2	0.8	alcohol metabolism
YNL173C	25.2	0.85	signal transduction during conjugation with cellular fusion
YDL214C	25.3	0.86	MAPKKK cascade
YOR161C	25.3	0.58	biological_process unknown
YLR399C	25.4	0.9	sporulation (sensu Saccharomyces)
YBR116C	25.4	0.49	biological_process unknown
YBR116C	25.4	0.49	biological_process unknown
YLR454W	25.4	0.76	biological_process unknown
YJL088W	25.5	0.65	arginine biosynthesis
YMR197C	25.5	0.82	Golgi to vacuole transport
YIR036C	25.6	0.86	biological_process unknown
YJR094C	25.6	0.52	meiosis
YBR043C	25.7	0.7	biological_process unknown
YBR222C	25.8	0.48	biological_process unknown
YKL164C	25.9	0.43	cell wall organization and biogenesis
YLR178C	25.9	0.87	regulation of proteolysis and peptidolysis
YOR355W	26	0.71	aerobic respiration
YDR342C	26	0.44	hexose transport
YDR074W	26.1	0.86	carbohydrate metabolism
YNL202W	26.2	0.71	fatty acid catabolism
YLR174W	26.3	0.8	glutamate biosynthesis
YOL151W	26.4	0.52	response to stress
YCR010C	26.5	0.68	DNA metabolism
YDR032C	26.6	0.7	biological_process unknown
YOR215C	26.6	0.86	biological_process unknown
YLL026W	26.7	0.75	protein folding
YCR083W	26.7	0.73	response to oxidative stress
YDR513W	26.8	0.58	regulation of redox homeostasis
YMR323W	26.9	0.63	biological_process unknown
YOL081W	26.9	0.74	RAS protein signal transduction
YPL147W	27	0.73	fatty acid transport
YBR117C	27	0.45	pentose-phosphate shunt
YFL006W	27	0.78	biological_process unknown
YDL020C	27	0.71	ubiquitin-dependent protein catabolism
YKR076W	27.1	0.76	cell wall organization and biogenesis
YBR169C	27.2	0.5	protein folding
YOR185C	27.2	0.86	nuclear organization and biogenesis
YPL113C	27.2	0.84	metabolism
YPL117C	27.2	0.58	ergosterol biosynthesis
YHR018C	27.2	0.61	arginine biosynthesis
YBR241C	27.3	0.73	biological_process unknown
YBR026C	27.4	0.72	aerobic respiration
YNL327W	27.4	0.44	cytokinesis
YBR090C	27.5	0.78	biological_process unknown
YDL078C	27.6	0.92	NADH regeneration
YNL015W	27.6	0.68	regulation of proteolysis and peptidolysis
YDL215C	27.7	0.88	nitrogen metabolism
YLR438W	27.8	0.77	arginine catabolism
YNL009W	27.9	0.71	NADPH regeneration
YMR246W	27.9	0.83	N-terminal protein myristoylation
YGR086C	28.1	0.84	biological_process unknown
YDR256C	28.2	0.71	oxygen and reactive oxygen species metabolism
YDL086W	28.3	0.65	biological_process unknown
YOR327C	28.3	0.42	Golgi to plasma membrane transport
YIR016W	28.6	0.9	biological_process unknown
YKR009C	28.7	0.74	fatty acid beta-oxidation
YGR142W	28.8	0.65	intracellular protein transport
YGR236C	28.9	0.62	biological_process unknown
YMR297W	29	0.9	vacuolar protein catabolism
YPR098C	29	0.72	biological_process unknown
YBR072W	29.4	0.65	protein folding
YPR182W	29.4	0.9	mRNA splicing
YMR148W	29.4	0.6	biological_process unknown
YDR070C	29.5	0.61	biological_process unknown
YNL194C	29.5	0.67	biological_process unknown
YJL159W	29.5	0.54	cell wall organization and biogenesis
YDL085W	29.7	0.73	NADH oxidation
YDR133C	29.7	0.45	biological_process unknown
YDR133C	29.7	0.45	biological_process unknown
YML054C	29.8	0.74	electron transport
YOL083W	29.9	0.87	biological_process unknown
YGR256W	29.9	0.54	glucose metabolism
YOL058W	30	0.6	arginine biosynthesis
YIR038C	30.2	0.75	glutathione metabolism
YFL007W	30.2	0.76	biological_process unknown
YGL121C	30.3	0.64	signal transduction
YIL057C	30.3	0.81	biological_process unknown
YMR174C	30.6	0.61	vacuolar protein catabolism
YPL276W	30.9	0.57	formate catabolism
YMR175W	31	0.52	response to dessication
YER004W	31.1	0.79	biological_process unknown
YOL147C	31.2	0.88	peroxisome organization and biogenesis
YJR109C	31.3	0.62	arginine biosynthesis
YBR101C	31.3	0.58	protein biosynthesis
YPL250C	31.5	0.59	biological_process unknown
YOR302W	31.6	0.46	regulation of protein biosynthesis
YEL060C	31.6	0.83	cellular response to starvation
YDR077W	31.6	0.85	cell wall organization and biogenesis
YDL223C	31.7	0.45	cellular morphogenesis during conjugation with cellular fusion
YMR173W	31.8	0.69	DNA repair
YPR151C	31.9	0.81	biological_process unknown
YNL125C	31.9	0.86	transport
YJL048C	32	0.9	biological_process unknown
YDR294C	32.2	0.87	calcium-mediated signaling
YOL154W	32.3	0.79	biological_process unknown
YOR230W	32.3	0.84	regulation of meiosis
YOL126C	32.4	0.91	gluconeogenesis
YBR230C	32.6	0.86	biological_process unknown
YOR388C	32.7	0.56	NADH regeneration
YMR303C	33	0.59	ethanol metabolism
YJR008W	33	0.92	biological_process unknown
YOR317W	33.8	0.74	N-terminal protein myristoylation
YKR049C	33.9	0.81	biological_process unknown
YMR110C	34.1	0.82	biological_process unknown
YLR109W	34.4	0.72	regulation of redox homeostasis
YDR525W-A	34.4	0.85	biological_process unknown
YIL124W	34.5	0.77	phosphatidic acid biosynthesis
YPL004C	34.5	0.85	biological_process unknown
YGR289C	34.8	0.75	alpha-glucoside transport
YBR046C	34.9	0.76	biological_process unknown
YBL078C	35.1	0.82	autophagy
YML075C	35.3	0.85	ergosterol biosynthesis
YAL054C	36.6	0.78	acetate fermentation
YOR031W	36.8	0.89	response to metal ion
YMR107W	37.6	0.82	biological_process unknown
YBR286W	37.9	0.78	vacuolar protein catabolism
YER069W	38.1	0.57	arginine biosynthesis
YOR303W	38.2	0.56	arginine biosynthesis
YPL092W	38.8	0.72	sulfite transport
YOL053C-A	38.9	0.75	biological_process unknown
YKR046C	39.1	0.79	biological_process unknown
YNL208W	39.6	0.59	biological_process unknown
YDR384C	39.8	0.71	nitrogen utilization
YHR096C	42.3	0.68	hexose transport
YPR149W	43.2	0.76	protein secretion
YBR067C	47.1	0.8	cell wall organization and biogenesis
YOR374W	49.1	0.73	ethanol metabolism
YOL155C	49.5	0.65	cell wall organization and biogenesis
YOL155C	49.5	0.65	cell wall organization and biogenesis
YFL014W	50.8	0.69	cell adhesion
