# Supplementary material for: Stochastic Modeling of Expression Kinetics Identifies Messenger Half-Lives and Reveals Sequential Waves of Co-ordinated Transcription and Decay
Source: PLoS Comput Biol. 2012 Nov 8;8(11):e1002772. doi: 10.1371/journal.pcbi.1002772 (PMC3493476; doi:10.1371/journal.pcbi.1002772)
Supplement: Table S7 — DRAGON estimated normalized half-lives using all yeast datasets. (XLSX) [file pcbi.1002772.s013.xlsx]

## Sheet: Foglio1
YBR296C	0.0128034
YMR075W	0.0225476
YLR297W	0.0262241
YDL105W	0.0277184
YGR238C	0.0331798
YDL127W	0.0349171
YPL014W	0.0349419
YPL221W	0.0360475
YBR071W	0.0391286
YLR273C	0.0416691
YDR191W	0.0423314
YDL138W	0.0468193
YKL104C	0.0476012
YML020W	0.0482895
YBL112C	0.0510496
YCL061C	0.0518078
YEL032W	0.0534758
YLR121C	0.0543144
YDL156W	0.0567535
YPR018W	0.0569793
YKL163W	0.0587379
YLR032W	0.0617932
YLR103C	0.0627547
YBL023C	0.0635864
YGR042W	0.0670332
YAL053W	0.0708181
YML069W	0.0715587
YDR503C	0.07322
YNL231C	0.0761936
YNL309W	0.0782802
YPR135W	0.0804651
YGL201C	0.0817709
YDL164C	0.0823112
YPL267W	0.0843429
YOR066W	0.0844768
YNL082W	0.0863906
YPL153C	0.0864972
YER095W	0.0877041
YOL017W	0.089236
YFL064C	0.0907722
YMR179W	0.0910497
YBR275C	0.0942517
YER111C	0.0946234
YGR221C	0.0946889
YFL065C	0.097706
YLL012W	0.0979294
YOR075W	0.0992111
YLR313C	0.0998804
YNL304W	0.100235
YGL163C	0.101324
YBR200W	0.103186
YGR143W	0.10359
YLR382C	0.103604
YJL115W	0.104438
YOR033C	0.105228
YPR175W	0.106766
YPR019W	0.111604
YJL073W	0.111695
YNL273W	0.111804
YDR013W	0.112776
YOR284W	0.112836
YDL103C	0.113744
YKL045W	0.113988
YML061C	0.115158
YEL076C	0.115769
YDR528W	0.118839
YPR075C	0.119199
YJL019W	0.119375
YKL042W	0.122386
YLR274W	0.124652
YGL175C	0.12478
YEL076C-A	0.125122
YJL194W	0.128601
YNL206C	0.132779
YOR114W	0.133022
YMR029C	0.140704
YJR006W	0.140714
YJR030C	0.141413
YKL089W	0.142253
YBR073W	0.144306
YDL018C	0.145092
YNL233W	0.146971
YGR153W	0.149596
YBR202W	0.150819
YLR383W	0.150952
YNL272C	0.152147
YOR144C	0.153403
YFL008W	0.156797
YJR043C	0.159467
YBL111C	0.161694
YPR174C	0.16206
YPL124W	0.165613
YDL197C	0.173205
YDL102W	0.175218
YCL024W	0.175851
YLR180W	0.176603
YAR003W	0.179672
YMR048W	0.180777
YLR151C	0.181182
YFL060C	0.182095
YNL165W	0.182795
YLL041C	0.183437
YDL101C	0.183951
YCR042C	0.187173
YDR279W	0.189433
YGL038C	0.192723
YOL006C	0.193074
YOR342C	0.195026
YOR288C	0.195438
YNL310C	0.197515
YOR195W	0.199061
YDR309C	0.199388
YOL090W	0.204077
YJL201W	0.206114
YMR078C	0.207875
YMR238W	0.208058
YEL040W	0.209761
YPL208W	0.211423
YDR307W	0.213642
YGR189C	0.21522
YGR188C	0.221573
YBL035C	0.224379
YIL159W	0.229602
YGR109C	0.231931
YMR199W	0.238219
YCR065W	0.241719
YLL022C	0.247841
YBL113C	0.248275
YAR007C	0.251532
YHR149C	0.251544
YNL181W	0.252501
YIL132C	0.254099
YNL072W	0.256182
YDL093W	0.260275
YBR161W	0.261406
YAR008W	0.266533
YOR074C	0.266739
YJR054W	0.272502
YLR050C	0.273322
YGR089W	0.277396
YPL255W	0.280619
YOR229W	0.281184
YDR097C	0.288905
YMR076C	0.289969
YIL026C	0.291998
YOL014W	0.293779
YHR153C	0.300555
YEL047C	0.311551
YOR127W	0.312139
YOR321W	0.313488
YGR092W	0.314707
YER016W	0.317183
YHR154W	0.318763
YNL263C	0.328391
YLR212C	0.329536
YJL091C	0.33207
YJL074C	0.340137
YML021C	0.3514
YMR006C	0.36071
YJL164C	0.367967
YKL067W	0.369825
YKL116C	0.371035
YGL027C	0.374434
YBR041W	0.384037
YNL102W	0.385353
YER042W	0.387389
YDR400W	0.389538
YPR159W	0.390838
YGR041W	0.391652
YKR090W	0.393886
YLR343W	0.394004
YGL061C	0.405376
YML109W	0.413051
YLR154C	0.41839
YHL026C	0.42026
YGR152C	0.440034
YDR518W	0.455104
YLR326W	0.457857
YLR183C	0.48622
YKL165C	0.498902
YDR501W	0.502261
YGR113W	0.50294
YKL113C	0.519071
YDR480W	0.520703
YML060W	0.523664
YNL262W	0.524918
YLL021W	0.537561
YGL257C	0.554762
YGR140W	0.575256
YJL079C	0.593498
YDR222W	0.597767
YPL004C	0.602401
YNL166C	0.621245
YBR184W	0.622312
YBR015C	0.639201
YIL140W	0.643147
YOL019W	0.644284
YPL256C	0.646304
YDR488C	0.648139
YHL021C	0.657892
YER170W	0.663172
YOR374W	0.666533
YOR084W	0.676265
YER018C	0.681617
YOL147C	0.68599
YNL312W	0.702678
YGL065C	0.714582
YML027W	0.722106
YMR031C	0.726242
YBR070C	0.726405
YKL029C	0.750599
YDR281C	0.759984
YLR058C	0.761643
YKL049C	0.769626
YBR088C	0.798387
YKL048C	0.81511
YNL289W	0.822178
YKL101W	0.833731
YMR144W	0.837649
YDL003W	0.840971
YHR151C	0.850778
YMR011W	0.860743
YJL187C	0.864197
YGL101W	0.88524
YHR104W	0.942856
YBL031W	0.954521
YDR179C	0.956715
YLR182W	0.957294
YOL007C	0.980855
YDR507C	1.00053
YDL124W	1.04629
YER118C	1.05756
YNL126W	1.06568
YOR373W	1.09625
YEL061C	1.12027
YNL099C	1.1224
YKR037C	1.12775
YMR305C	1.13206
YBR087W	1.13839
YKL069W	1.14862
YMR295C	1.15825
YPR141C	1.15827
YKL008C	1.17056
YBR008C	1.1738
YNL088W	1.20481
YDR219C	1.25722
YDR144C	1.29042
YCL040W	1.29661
YBR054W	1.30123
YKR013W	1.37157
YDR077W	1.37572
YJL159W	1.38579
YKR010C	1.42008
YPR106W	1.44641
YMR183C	1.44903
YMR055C	1.45782
YER001W	1.47463
YHR146W	1.50354
YDR089W	1.58892
YPL032C	1.60001
YOR313C	1.60278
YBL009W	1.61825
YHR061C	1.66759
YPR104C	1.67577
YDR019C	1.7193
YDR261C	1.73061
YJL173C	1.73115
YGL037C	1.7406
YOR327C	1.78902
YOR233W	1.8055
YNL238W	1.81459
YML064C	1.829
YPL075W	2.0178
YNL197C	2.04819
YLR455W	2.0757
YEL071W	2.07636
YER114C	2.0875
YDR297W	2.09599
YOR372C	2.13489
YNL176C	2.14137
YML072C	2.17827
YPL163C	2.20799
YOL069W	2.28871
YJL118W	2.32219
YMR163C	2.33231
YDL155W	2.39
YLR373C	2.41733
YGL216W	2.50872
YHR086W	2.51064
YML125C	2.51239
YJR112W	2.59299
YDR171W	2.61281
YDR147W	2.61982
YJR001W	2.67791
YJL198W	2.72802
YOR188W	2.732
YBL085W	2.79513
YLR049C	2.80475
YEL036C	2.8073
YGR099W	2.8374
YNR009W	2.8679
YMR251W-A	2.93946
YJL097W	3.00084
YBL063W	3.00801
YGL139W	3.0316
YGR098C	3.09466
YOR307C	3.12842
YDR451C	3.2138
YLR342W	3.21889
YHR135C	3.2259
YPR052C	3.2934
YBR139W	3.32929
YOR073W	3.50455
YDR346C	3.57877
YJR003C	3.63534
YLR210W	3.75254
YIR010W	3.83407
YER070W	3.84893
YDR227W	4.01801
YLR194C	4.02764
YPL265W	4.06195
YAL007C	4.13925
YMR274C	4.14312
YBL052C	4.17939
YNL283C	4.28999
YJL092W	4.30959
YOR129C	4.32748
YNL141W	4.38726
YHR108W	4.44901
YLR045C	4.49476
YNL037C	4.53283
YDR325W	4.75819
YLR209C	4.79916
YNL087W	4.8068
YPL128C	4.85021
YJL137C	4.98917
YLL032C	5.03008
YBL082C	5.08133
YKL183W	5.09012
YGR014W	5.17573
YMR190C	5.24736
YPL116W	5.45237
YPL253C	5.69686
YAR018C	5.70128
YPR004C	5.74436
YLR438W	5.9784
YBR133C	6.01359
YKL127W	6.04433
YIL106W	6.64219
YDL157C	6.73319
YLR083C	6.82701
YDR302W	6.92559
YBR086C	6.93834
YDR150W	7.07791
YMR292W	7.09375
YLR437C	7.17622
YML065W	7.20212
YER003C	7.21658
YJL134W	7.34944
YCR034W	7.4686
YLR079W	7.56349
YPL127C	7.63539
YKL130C	7.74309
YLL031C	7.85949
YHR023W	7.94851
YOR246C	7.94888
YOR326W	7.99314
YFR028C	8.24935
YBR243C	8.61406
YBR123C	8.82245
YMR003W	8.90694
YMR189W	8.907
YKL185W	9.07495
YOL030W	9.21329
YDR245W	9.28168
YCR084C	9.37398
YJR076C	9.40156
YLR131C	9.84049
YIL131C	9.87346
YGL116W	10.1649
YNL068C	10.4111
YPL227C	10.488
YER032W	11.5646
YBR010W	12.8368
YBR138C	13.0433
YML119W	13.0919
YIL123W	13.4814
YNL216W	13.4877
YCL063W	14.1751
YCL014W	14.5181
YFL017C	15.294
YDR224C	15.5421
YNL031C	15.5446
YBL032W	15.9049
YPL141C	15.9671
YKL164C	16.1444
YJL183W	16.9002
YBR092C	17.3075
YML034W	17.8889
YOL012C	18.0206
YEL017W	19.1191
YBR187W	19.7706
YKL004W	19.9587
YBR078W	21.4455
YHR152W	22.4342
YMR215W	22.5016
YEL042W	22.583
YJL051W	23.7055
YML124C	23.7222
YPL155C	24.2115
YML085C	24.2641
YBL003C	24.6895
YNL058C	26.0613
YGL021W	28.3675
YML058W	31.6482
YPL242C	33.6312
YBL002W	36.7158
YDR146C	37.2655
YDR225W	38.3267
YMR001C	48.6938
YOR247W	51.8981
YBR009C	61.3183
YKL035W	61.6509
YLR190W	62.7953
YOR315W	80.1313
YIL158W	110.709
YGR108W	111.016
YMR032W	131.093
YBR038W	139.526
YPR119W	143.33
YJR092W	146.696
YOR025W	172.808
YML052W	176.141
YJL158C	329.774
